# Supplementary material
Source: MDPI journal article supplement (https://www.mdpi.com/1424-8247/15/2/248)
Supplement: s1 [file s1]

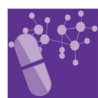

## Supporting Information

# Design, Synthesis, and Biological Evaluation of 4,4'-Difluorobenzhydrol Carbamates as Selective M<sub>1</sub> Antagonists

Jonas Kilian <sup>1</sup>, Marius Ozenil <sup>1</sup>, Marlon Millard <sup>2</sup>, Dorka Fürtös <sup>2</sup>, Verena Maisetschläger <sup>2</sup>, Wolfgang Holzer <sup>2</sup>, Wolfgang Wadsak <sup>1,3</sup>, Marcus Hacker <sup>1</sup>, Thierry Langer <sup>2</sup> and Verena Pichler <sup>2,\*</sup>

<sup>1</sup> Department of Biomedical Imaging and Image-guided Therapy, Division of Nuclear Medicine, Medical University of Vienna, 1090 Vienna, Austria; jonas.kilian@meduniwien.ac.at (J.K.); marius.ozenil@meduniwien.ac.at (M.O.); wolfgang.wadsak@meduniwien.ac.at (W.W.); marcus.hacker@meduniwien.ac.at (M.H.)

<sup>2</sup> Department of Pharmaceutical Sciences, Division of Pharmaceutical Chemistry, Faculty of Life Sciences, University of Vienna, 1090 Vienna, Austria; marlon.millard@univie.ac.at (M.M.); a01546417@unet.univie.ac.at (D.F.); a01631177@unet.univie.ac.at (V.M.); wolfgang.holzer@univie.ac.at (W.H.); thierry.langer@univie.ac.at (T.L.)

<sup>3</sup> CBmed GmbH—Center for Biomarker Research in Medicine, 8036 Graz, Austria

\* Correspondence: verena.pichler@univie.ac.at (V.P.); Tel.: +43-1-4277-55624

## Table of Contents

|                                                |                              |
|------------------------------------------------|------------------------------|
| Docking Poses and Pharmacophores               | 2                            |
| Stability in Cell Culture Medium               | 6                            |
| MTT Assay                                      | 6                            |
| Single-concentration Radioligand Binding Assay | 6                            |
| HPLC Chromatograms                             | Error! Bookmark not defined. |
| NMR Spectra                                    | 12                           |

## Docking Poses and Pharmacophores

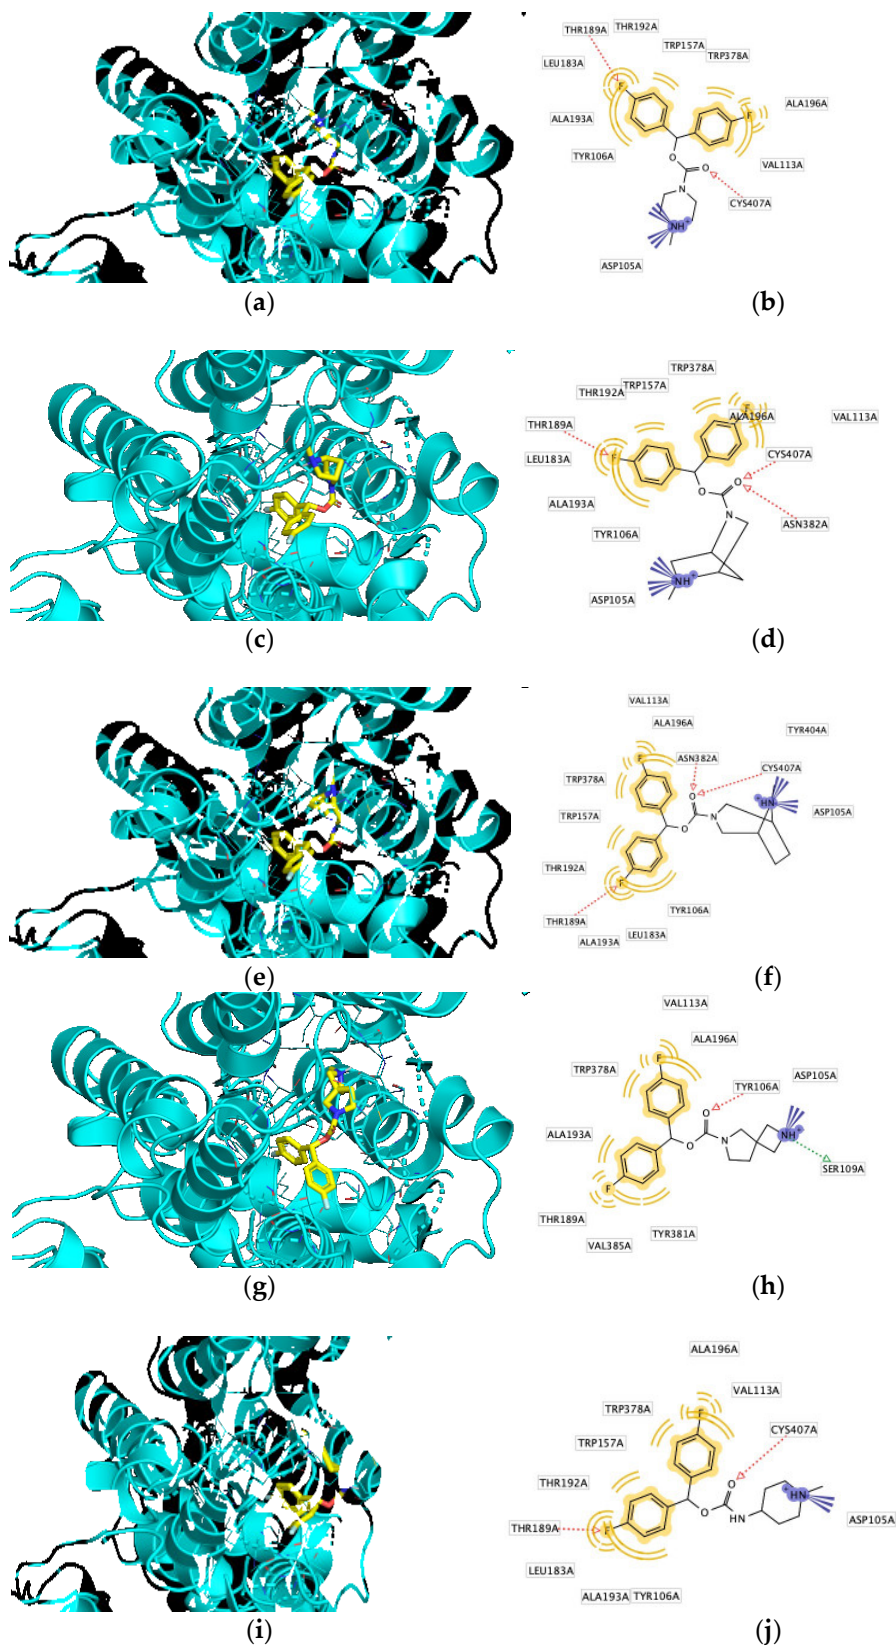

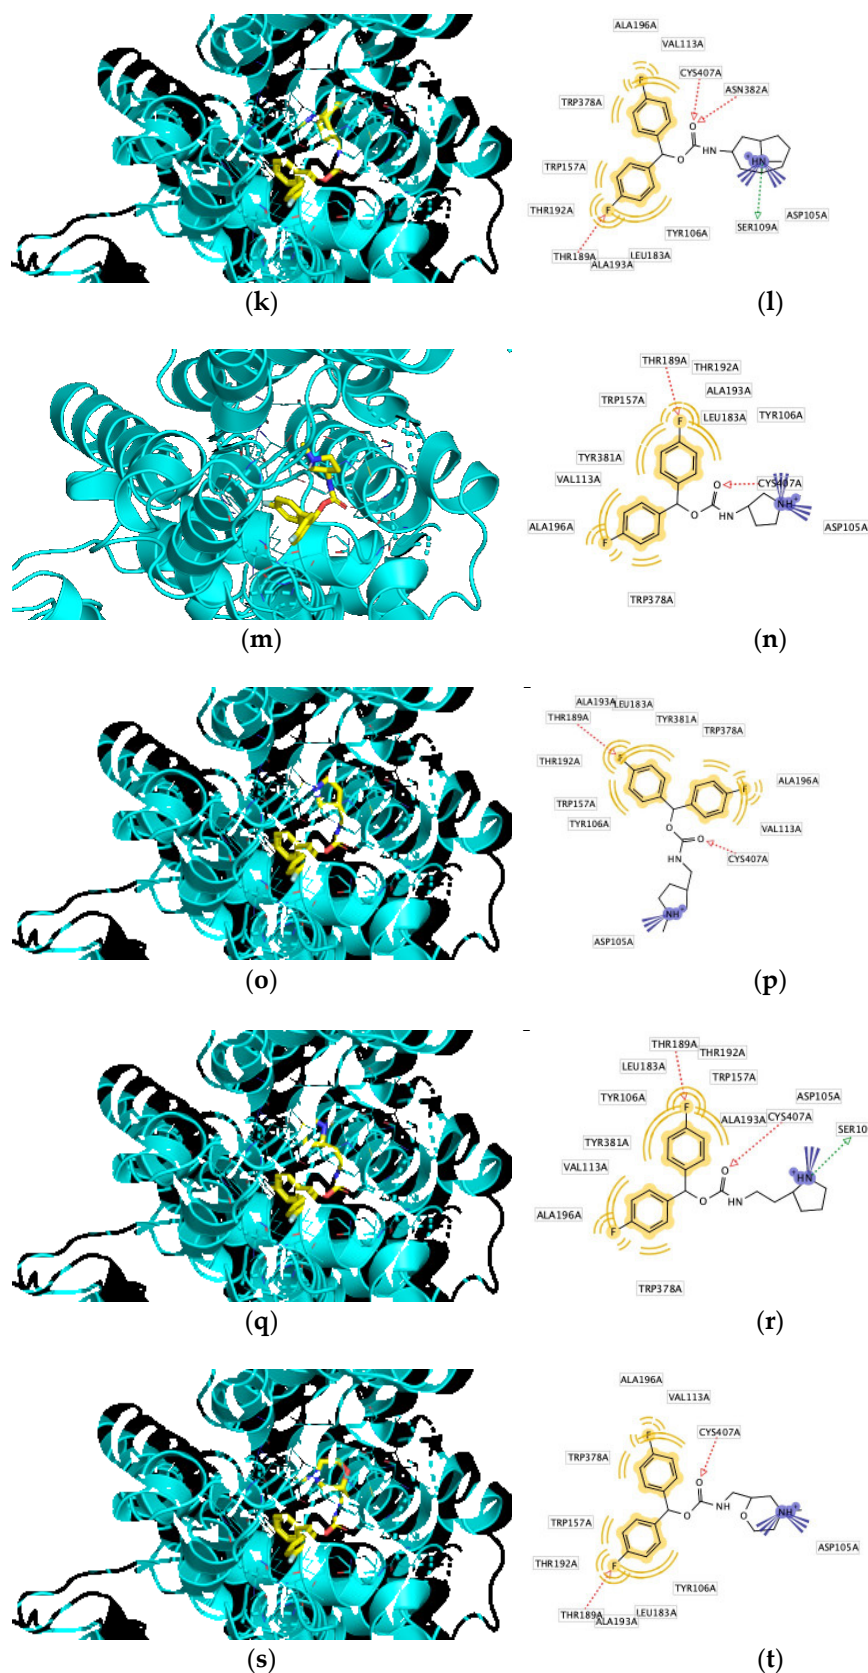

**Figure S1.** Docking poses for compounds **1**, **3–6**, and **8–12** (carbons in yellow) in the orthosteric binding site of M<sub>1</sub> (PDB 5CXV) and the corresponding 2D pharmacophores. In case of chiral secondary carbamates, only one enantiomer is shown. (a) docking pose of **1**; (b) 2D pharmacophore of **1**; (c) docking pose of **3**; (d) 2D pharmacophore of **3**; (e) docking pose of **4**; (f) 2D pharmacophore of **4**; (g) docking pose of **5**; (h) 2D pharmacophore of **5**; (i) docking pose of **6**; (j) 2D pharmacophore of **6**; (k) docking pose of **8**; (l) 2D pharmacophore of **8**; (m) docking pose of **9**; (n) 2D pharmacophore of **9**; (o) docking pose

of **10**; (p) 2D pharmacophore of **10**; (q) docking pose of **11**; (r) 2D pharmacophore of **11**; (s) docking pose of **12**; (t) 2D pharmacophore of **12**.

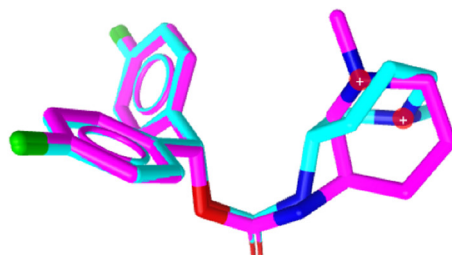

(a)

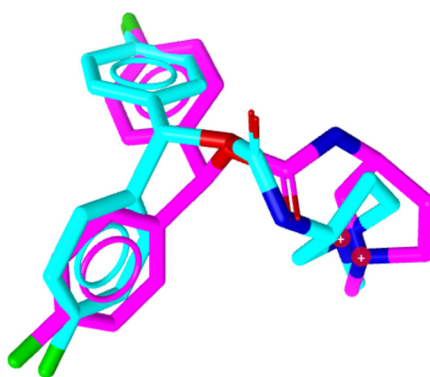

(b)

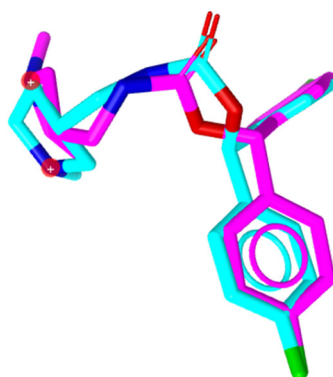

(c)

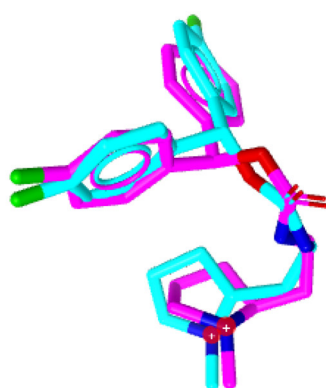

(d)

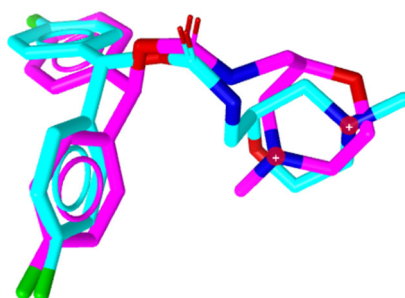

(e)

**Figure S2.** Superimposed docking poses for the enantiomeric pairs of 7 and 9–12. (a) docking poses of (*R*)- and (*S*)-7; (b) docking poses of (*R*)- and (*S*)-9; (c) docking poses of (*R*)- and (*S*)-10; (d) docking poses of (*R*)- and (*S*)-11; (e) docking poses of (*R*)- and (*S*)-12.

### Stability in Cell Culture Medium

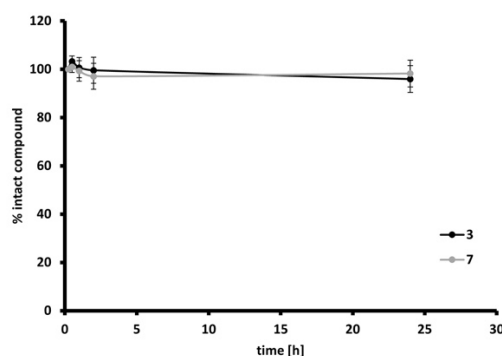

**Figure S3.** Stability of **3** and **7** in fully supplemented RPMI1640 cell culture medium at 20 °C. Error bars represent the standard deviation.

### MTT Assay

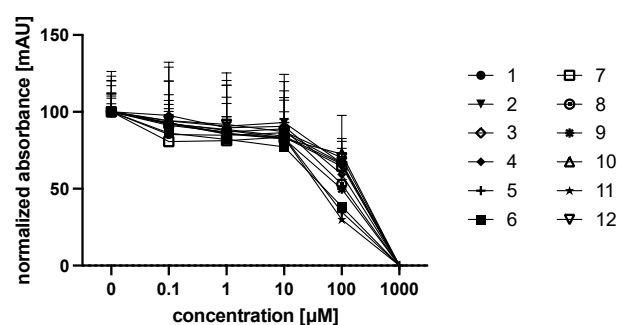

**Figure S4.** Concentration-dependent Cell viability of **1–12** assessed in living CHO-*hM*<sub>1</sub> cells using an MTT assay. Error bars represent the standard deviation.

### Single-concentration Radioligand Binding Assay

Percent displacements of compounds that were excluded from full-range concentration dependent radioligand binding assays to determine their affinities are displayed in Table S1.

**Table S1.** Percent displacements of [<sup>3</sup>H]NMS binding on cell membranes derived from CHO-K1 cells expressing *hM*<sub>x</sub> receptors at ligand concentrations corresponding to a *K*<sub>i</sub> value of 1 μM according to the Cheng-Prusoff Equation.

| Cmpd.     | Displacement <sup>1</sup> ± SD (%) |                        |                        |                        |                        |
|-----------|------------------------------------|------------------------|------------------------|------------------------|------------------------|
|           | <i>hM</i> <sub>1</sub>             | <i>hM</i> <sub>2</sub> | <i>hM</i> <sub>3</sub> | <i>hM</i> <sub>4</sub> | <i>hM</i> <sub>5</sub> |
| <b>6</b>  | 52 ± 8                             | 10 ± 7                 | 29 ± 5                 | 48 ± 9                 | 54 ± 8                 |
| <b>11</b> | 53 ± 8                             | 37 ± 15                | 62 ± 3                 | 54 ± 13                | 59 ± 17                |
| <b>12</b> | 39 ± 5                             | 8 ± 5                  | 25 ± 9                 | 20 ± 8                 | 43 ± 11                |

<sup>1</sup> Each value is the mean of at least three independent experiments carried out in triplicate.

## Purity measured by HPLC

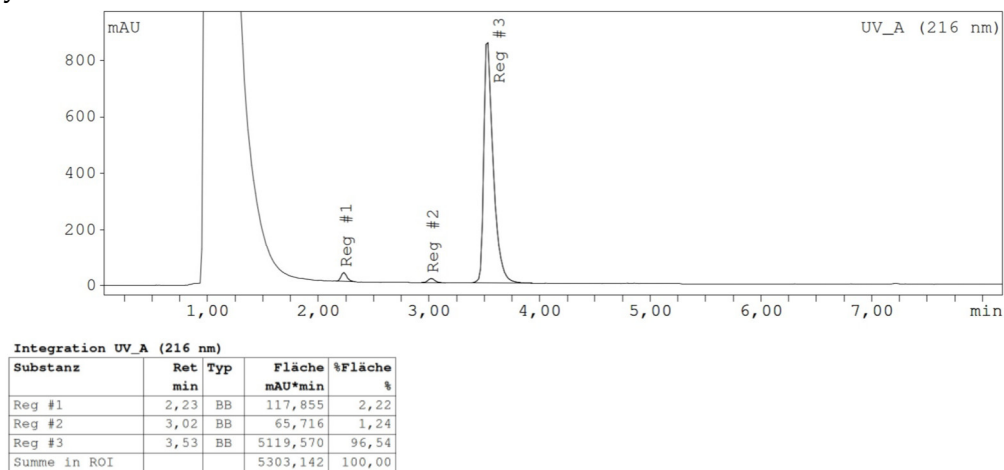Figure S5. Isocratic HPLC chromatogram of 1. 60% ACN in 25 mM  $\text{NH}_4\text{H}_2\text{PO}_4$  buffer pH 9.3.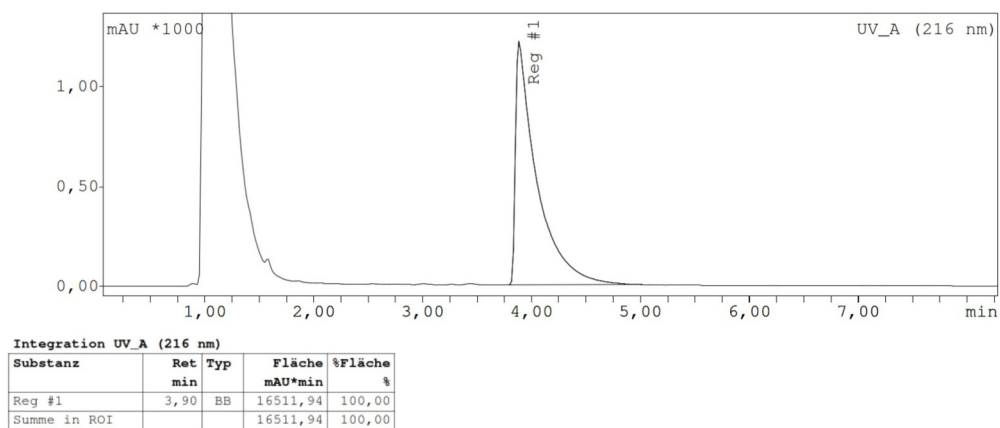Figure S6. Isocratic HPLC chromatogram of 2. 60% ACN in 25 mM  $\text{NH}_4\text{H}_2\text{PO}_4$  buffer pH 9.3.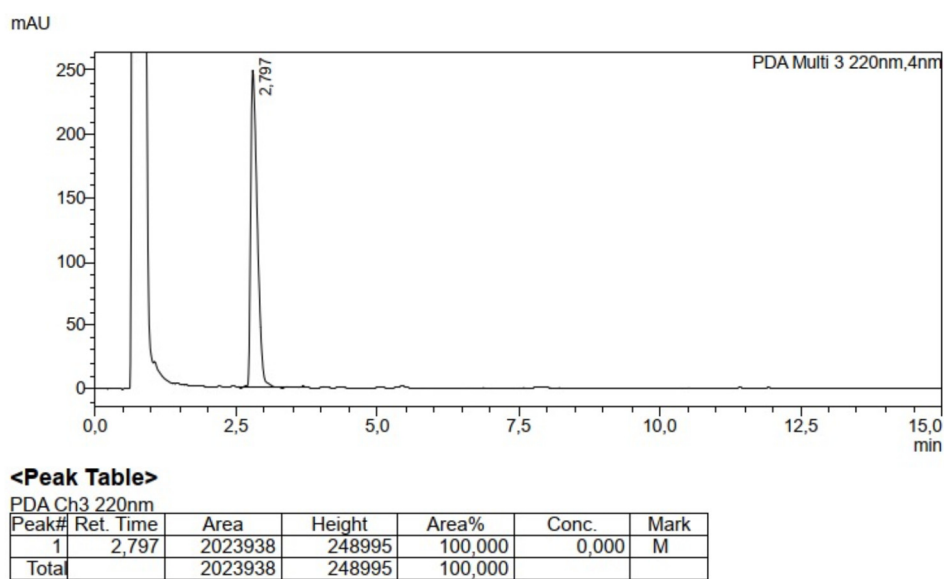Figure S7. Isocratic HPLC chromatogram of 3. 35% ACN in  $\text{H}_2\text{O}$ , 0.1% TFA.



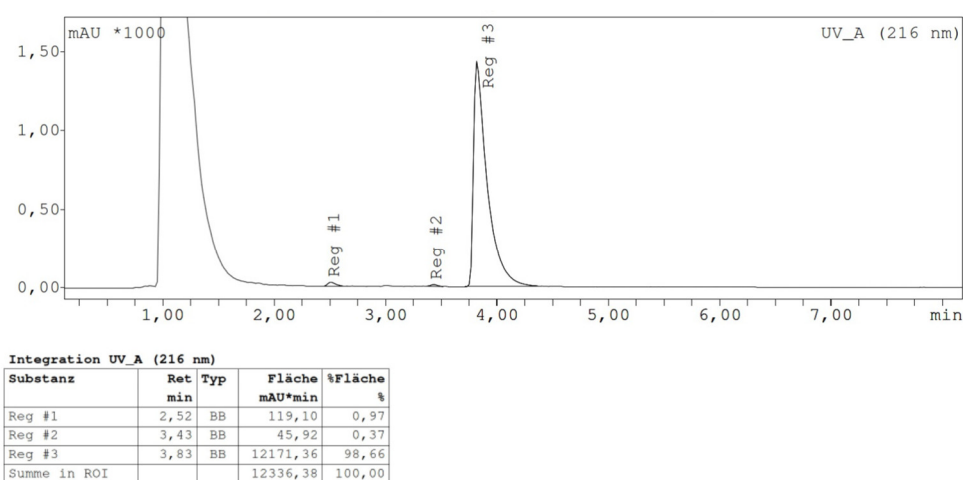

Figure S8. Isocratic HPLC chromatogram of 4. 60% ACN in 25 mM  $\text{NH}_4\text{H}_2\text{PO}_4$  buffer pH 9.3.

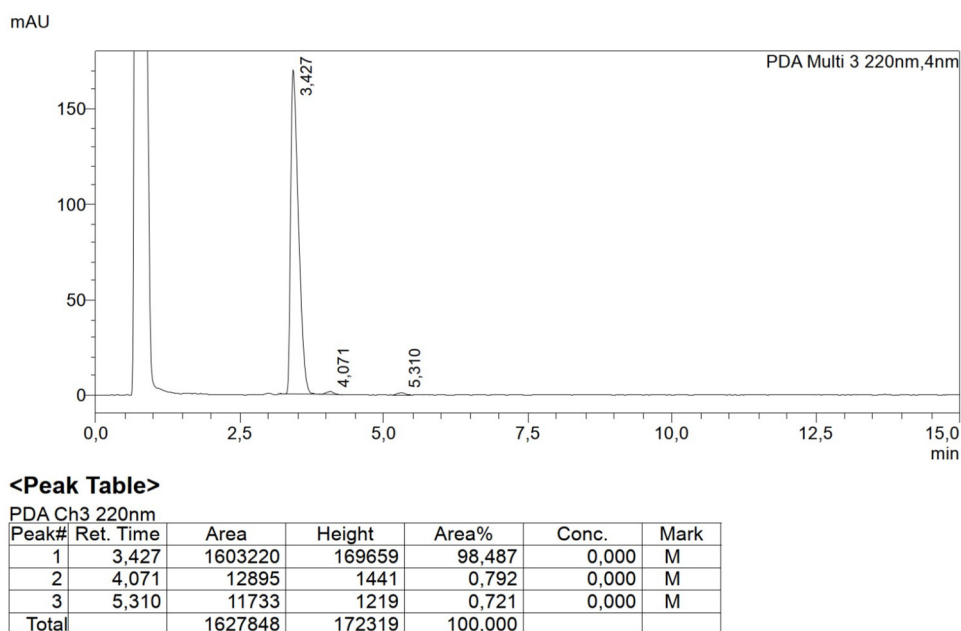

Figure S9. Isocratic HPLC chromatogram of 5. 35% ACN in  $\text{H}_2\text{O}$ , 0.1% TFA.

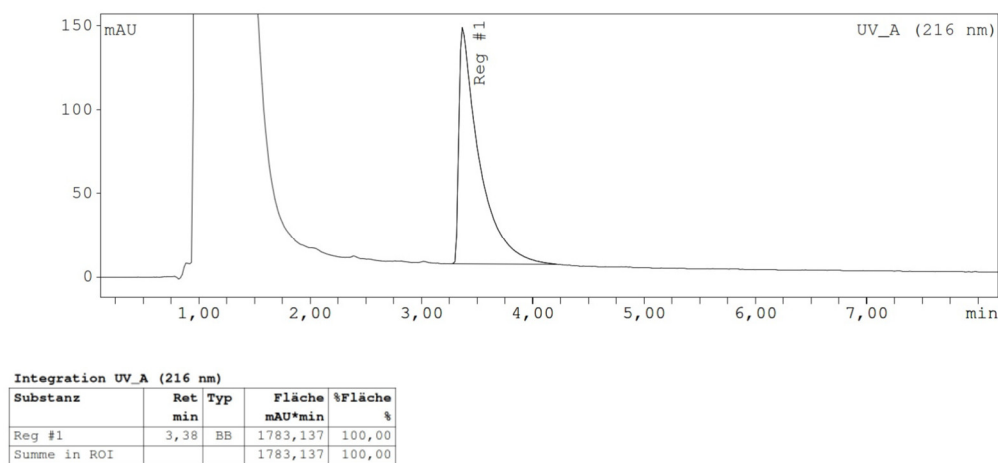

Figure S10. Isocratic HPLC chromatogram of 6. 60% ACN in 25 mM  $\text{NH}_4\text{H}_2\text{PO}_4$  buffer pH 9.3.



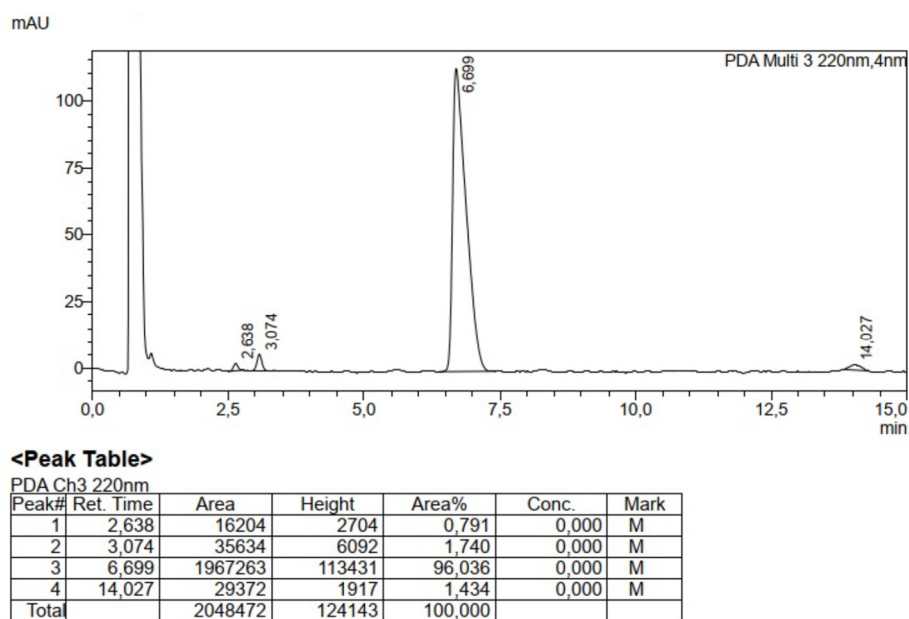

**Figure S11.** Isocratic HPLC chromatogram of 7. 30% ACN in H<sub>2</sub>O, 0.1% TFA.

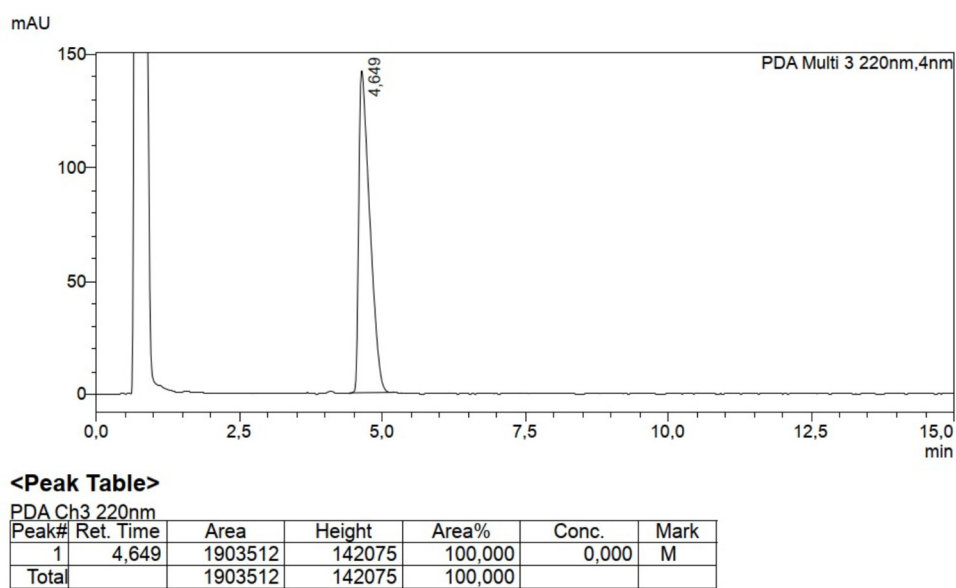

**Figure S12.** Isocratic HPLC chromatogram of 8. 35% ACN in H<sub>2</sub>O, 0.1% TFA.

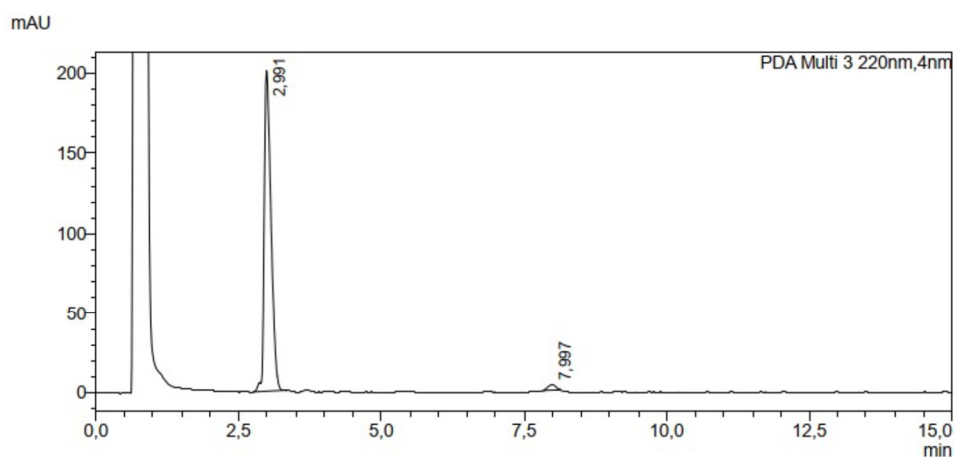

**<Peak Table>**

PDA Ch3 220nm

| Peak# | Ret. Time | Area    | Height | Area%   | Conc. | Mark |
|-------|-----------|---------|--------|---------|-------|------|
| 1     | 2.991     | 1658055 | 200594 | 98,079  | 0,000 | M    |
| 2     | 7.997     | 32479   | 3252   | 1,921   | 0,000 | M    |
| Total |           | 1690535 | 203847 | 100,000 |       |      |

**Figure S13.** Isocratic HPLC chromatogram of **9**. 35% ACN in H<sub>2</sub>O, 0.1% TFA.

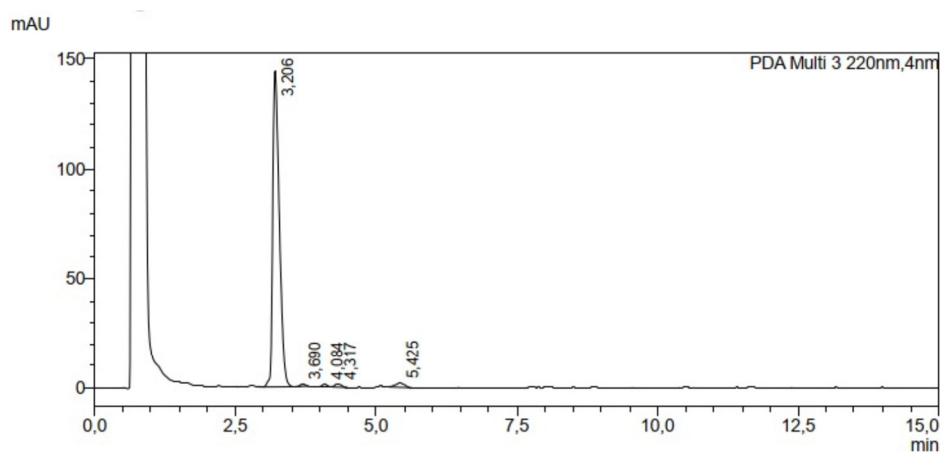

**<Peak Table>**

PDA Ch3 220nm

| Peak# | Ret. Time | Area    | Height | Area%   | Conc. | Mark |
|-------|-----------|---------|--------|---------|-------|------|
| 1     | 3.206     | 1173117 | 144193 | 96,221  | 0,000 | M    |
| 2     | 3.690     | 5953    | 900    | 0,488   | 0,000 | M    |
| 3     | 4.084     | 8055    | 1301   | 0,661   | 0,000 | M    |
| 4     | 4.317     | 10883   | 1447   | 0,893   | 0,000 | M    |
| 5     | 5.425     | 21185   | 1896   | 1,738   | 0,000 | M    |
| Total |           | 1219194 | 149737 | 100,000 |       |      |

**Figure S14.** Isocratic HPLC chromatogram of **10**. 35% ACN in H<sub>2</sub>O, 0.1% TFA.

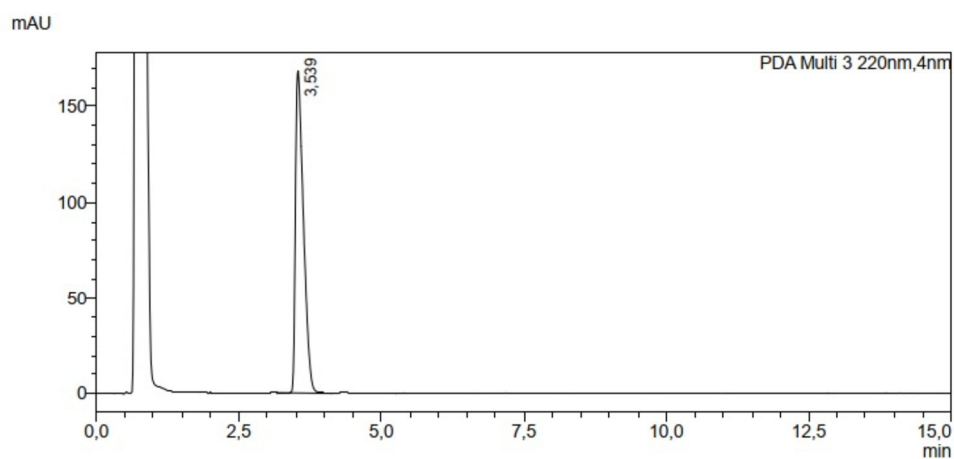**<Peak Table>**

PDA Ch3 220nm

| Peak# | Ret. Time | Area    | Height | Area%   | Conc. | Mark |
|-------|-----------|---------|--------|---------|-------|------|
| 1     | 3,539     | 1642714 | 168041 | 100,000 | 0,000 | M    |
| Total |           | 1642714 | 168041 | 100,000 |       |      |

**Figure S15.** Isocratic HPLC chromatogram of **11**. 35% ACN in H<sub>2</sub>O, 0.1% TFA.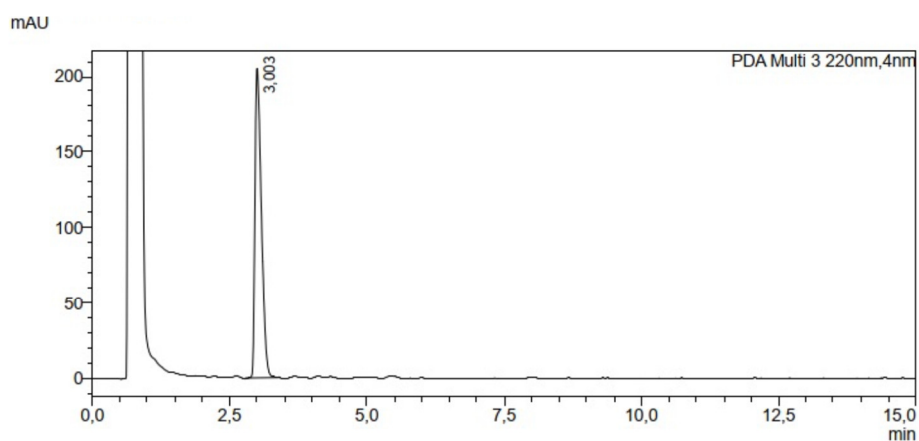**<Peak Table>**

PDA Ch3 220nm

| Peak# | Ret. Time | Area    | Height | Area%   | Conc. | Mark |
|-------|-----------|---------|--------|---------|-------|------|
| 1     | 3,003     | 1667422 | 204334 | 100,000 | 0,000 | M    |
| Total |           | 1667422 | 204334 | 100,000 |       |      |

**Figure S16.** Isocratic HPLC chromatogram of **12**. 35% ACN in H<sub>2</sub>O, 0.1% TFA.

## NMR Spectra

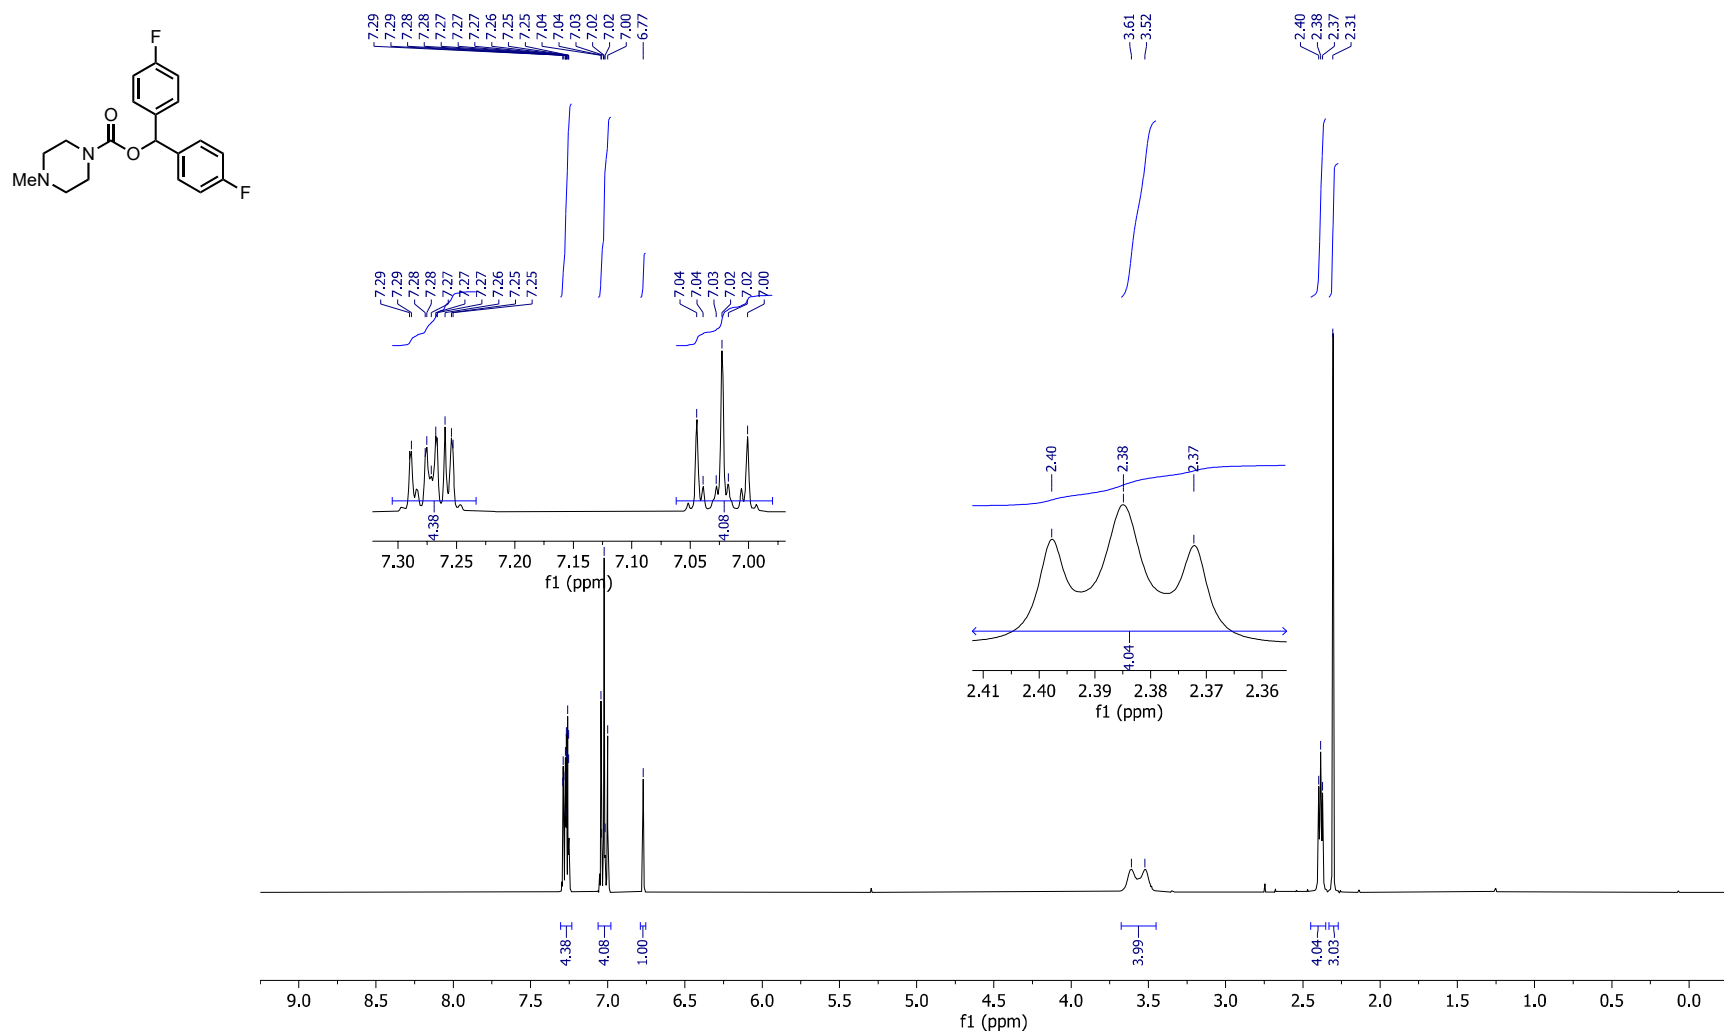Figure S17.  $^1\text{H}$  NMR spectrum of **1** (400 MHz,  $\text{CDCl}_3$ ).

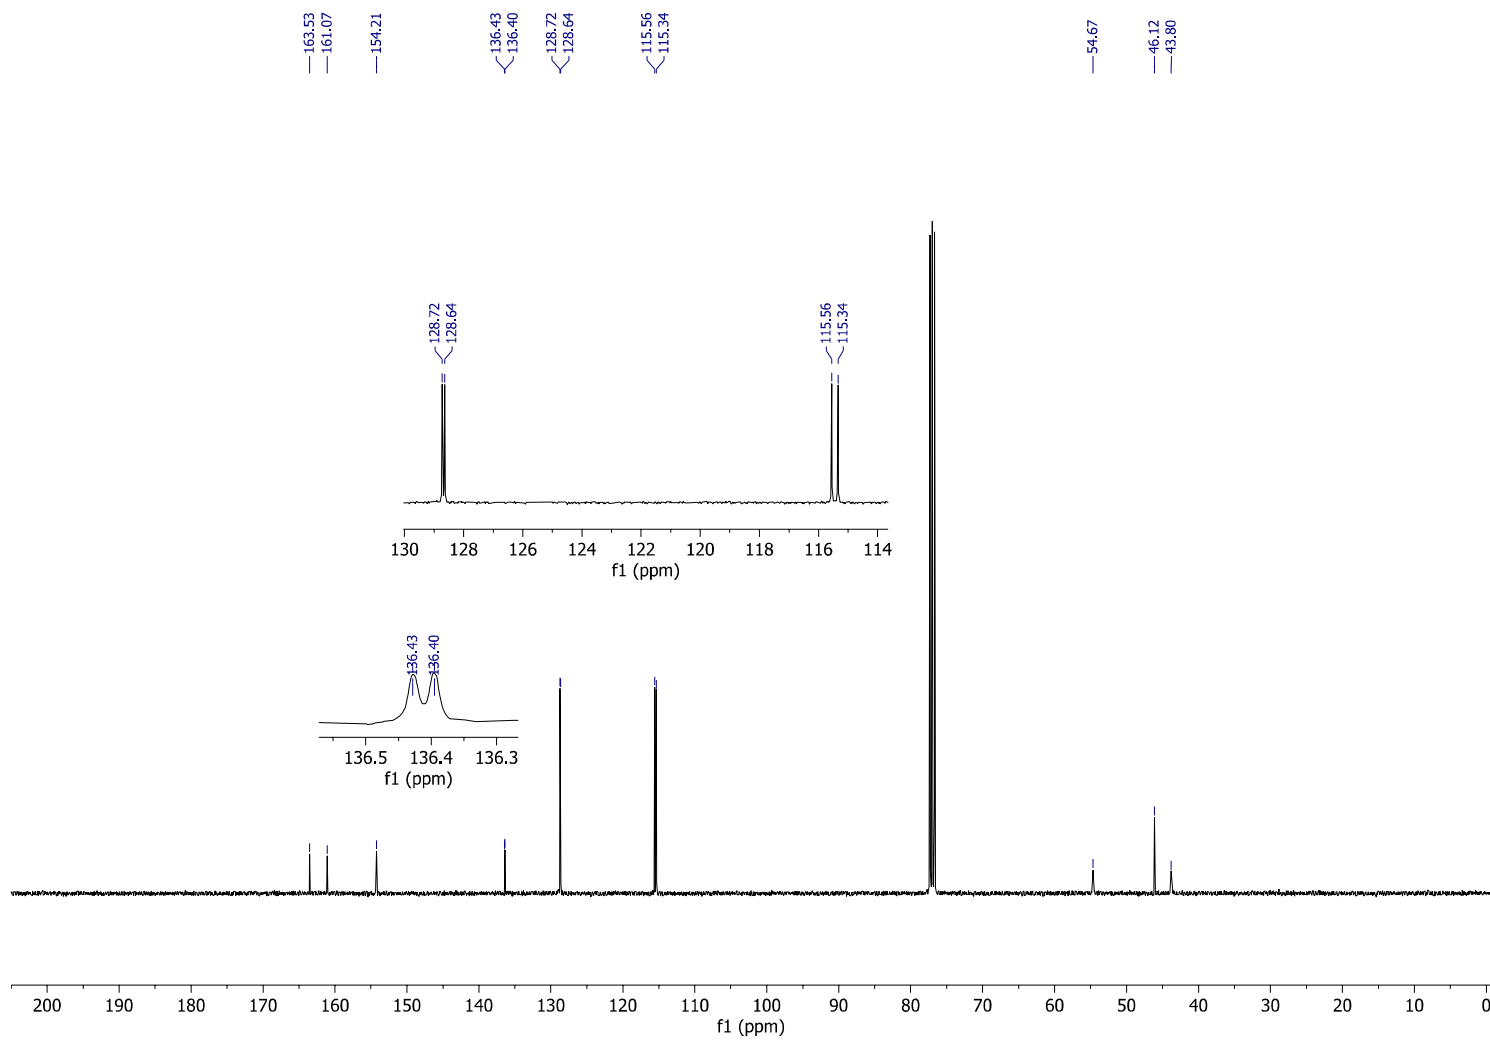**Figure S18.** <sup>13</sup>C NMR spectrum of **1** (100 MHz, CDCl<sub>3</sub>).

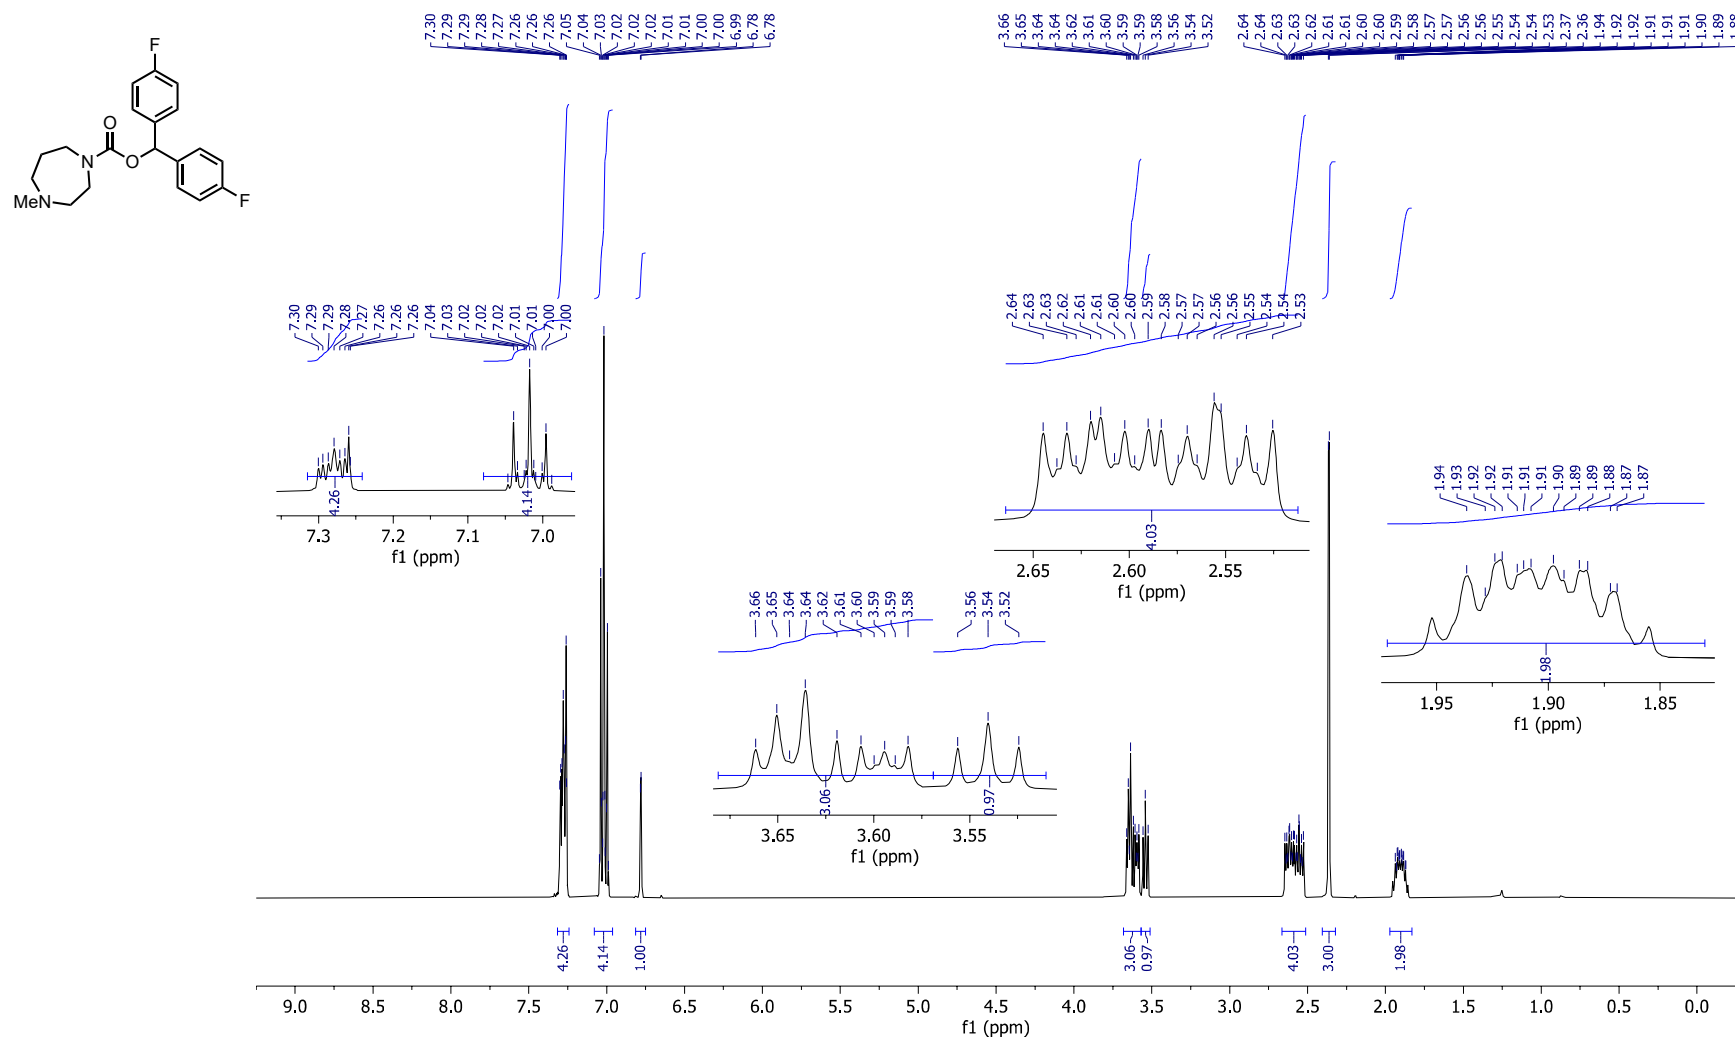**Figure S19.**  $^1\text{H}$  NMR spectrum of **2** (400 MHz,  $\text{CDCl}_3$ ).

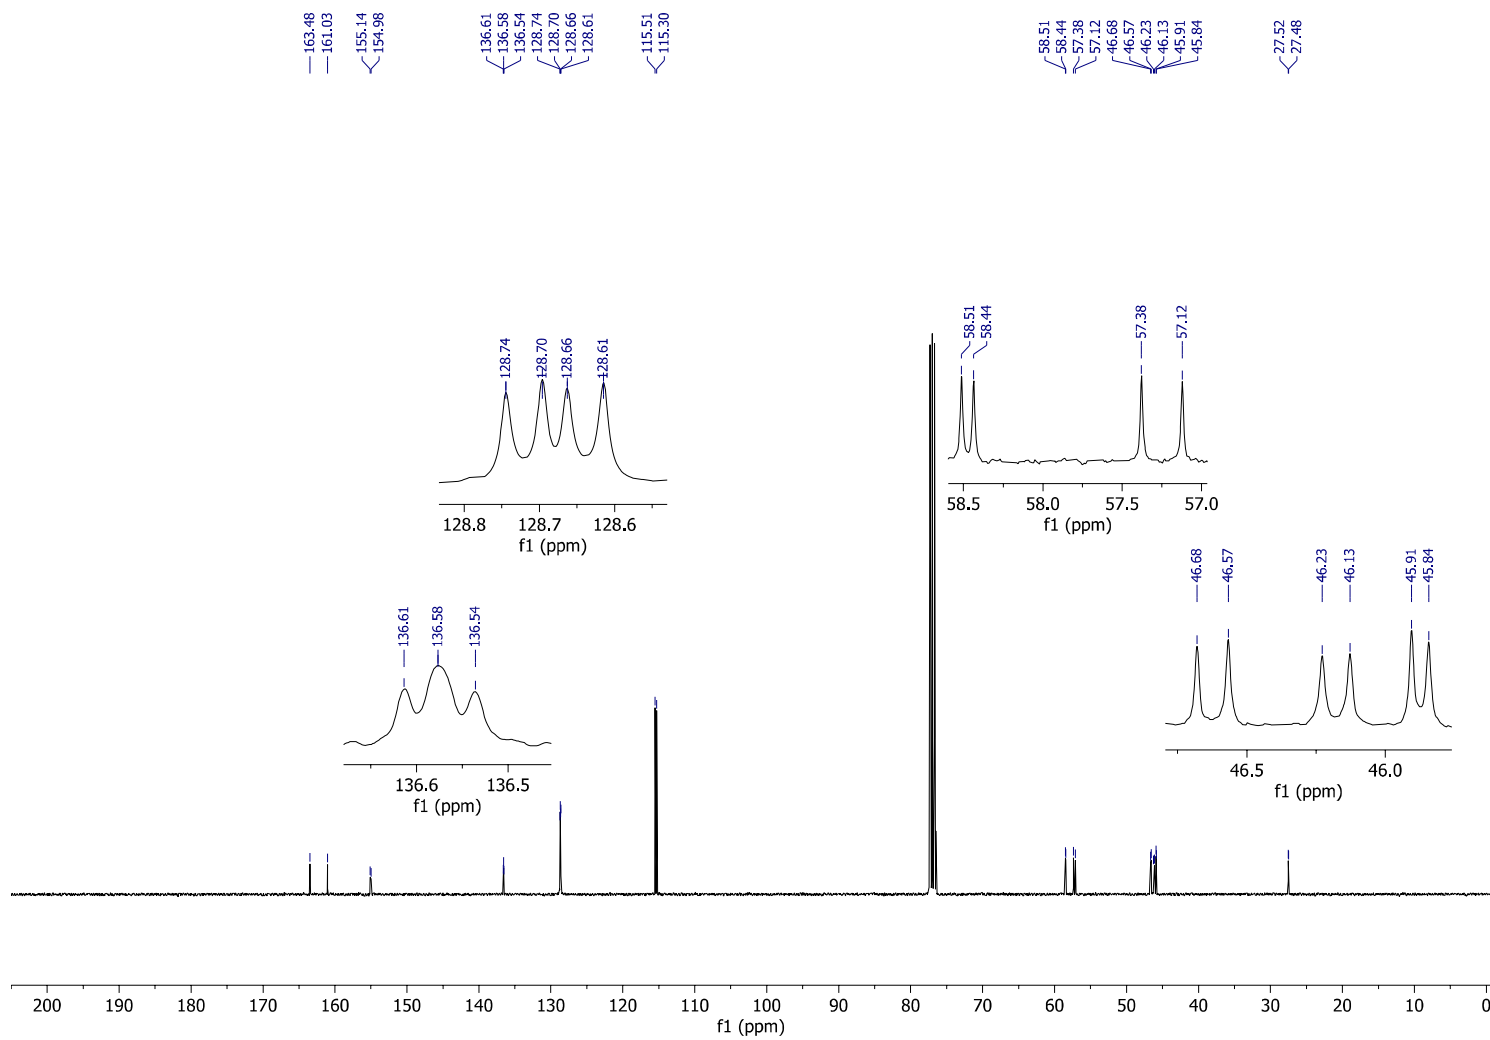

**Figure S20.**  $^{13}\text{C}$  NMR spectrum of **2** (100 MHz,  $\text{CDCl}_3$ ).



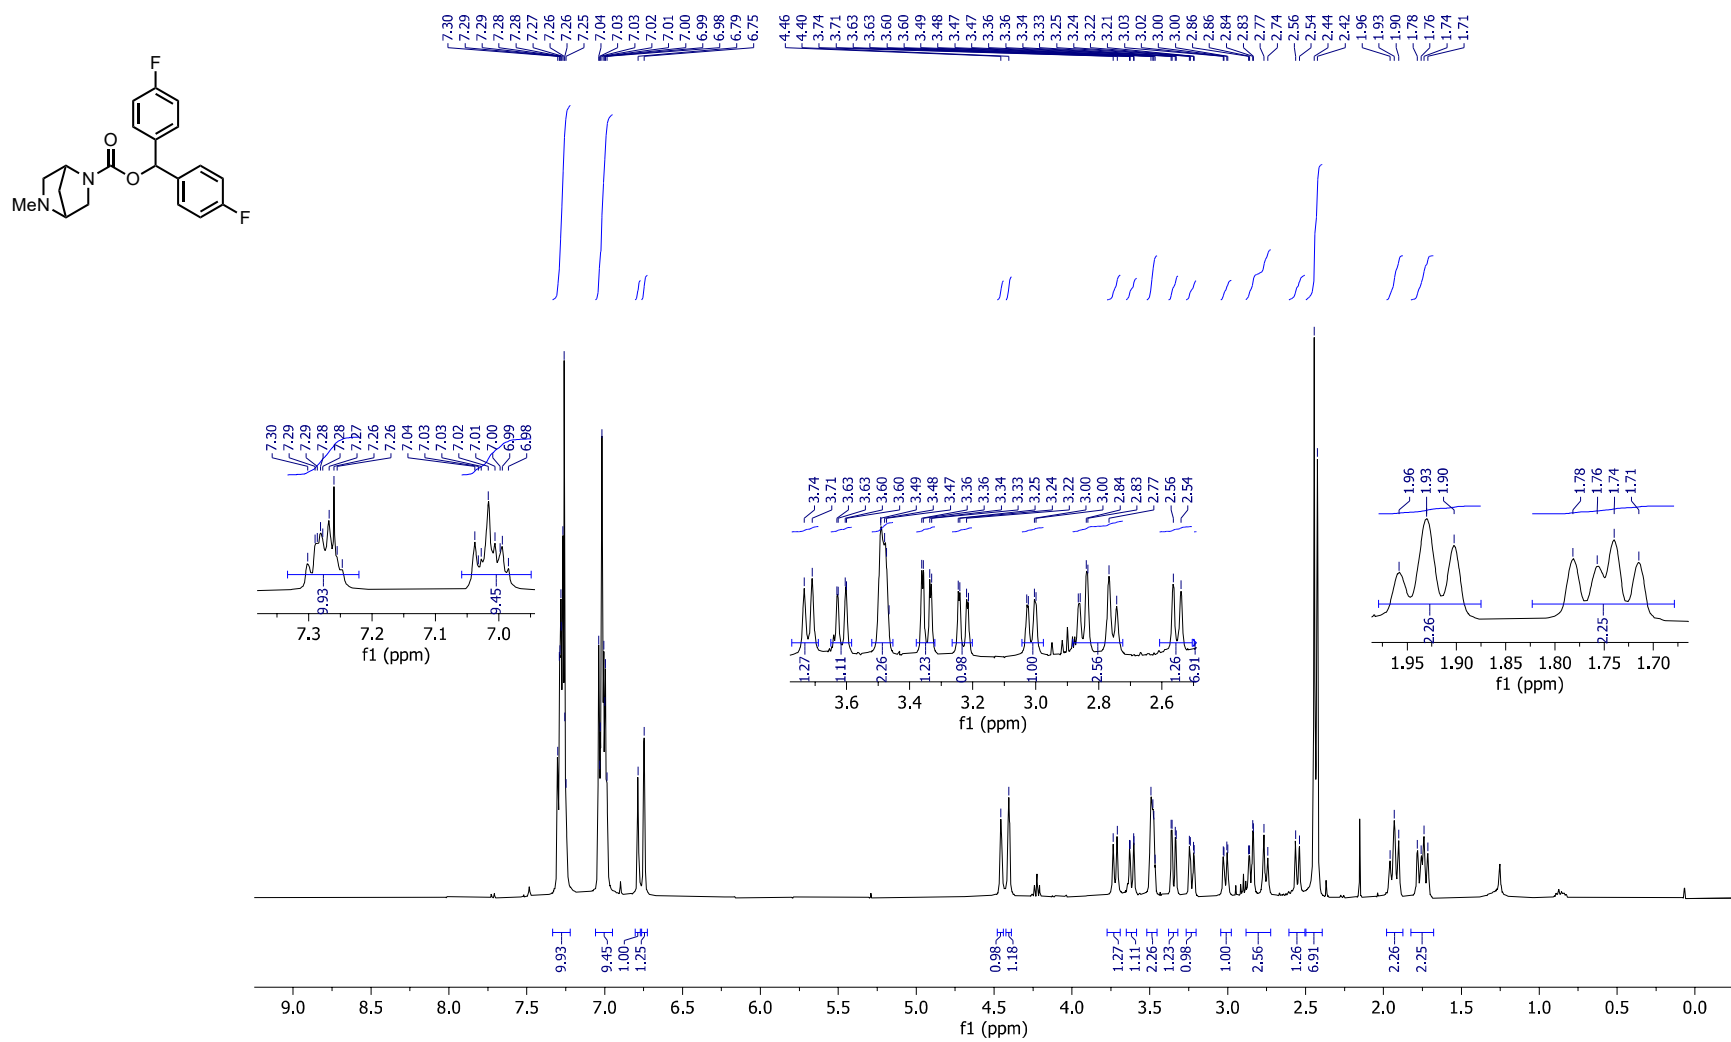Figure S21. <sup>1</sup>H NMR spectrum of 3 (400 MHz, CDCl<sub>3</sub>).

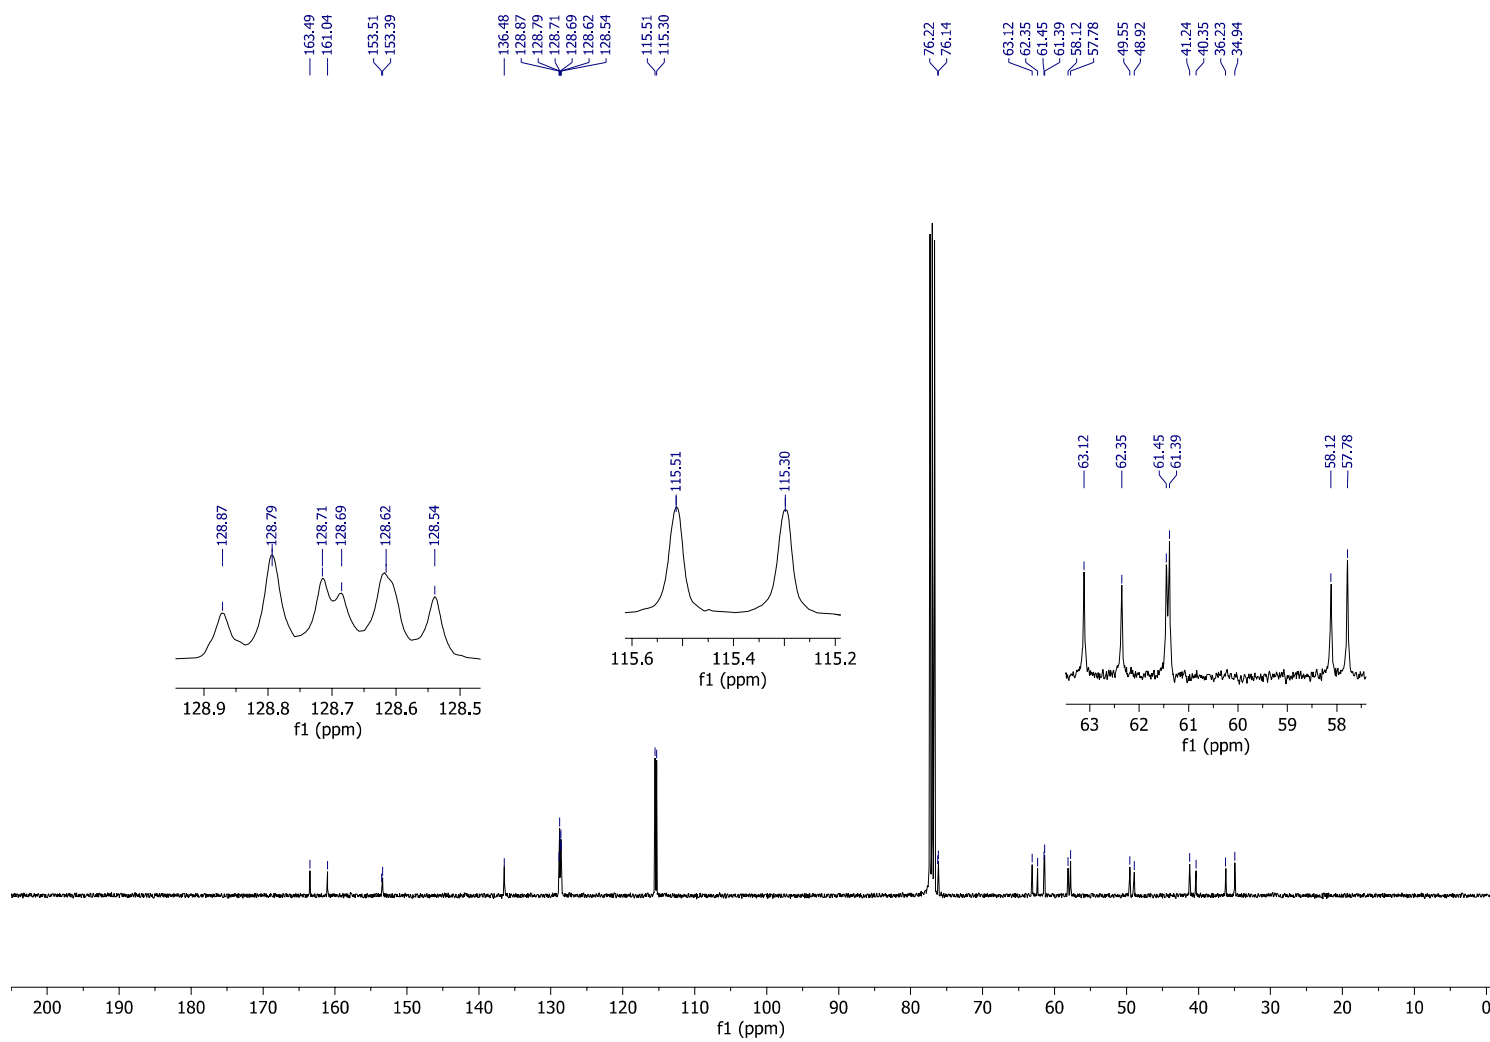

**Figure S22.**  $^{13}\text{C}$  NMR spectrum of **3** (100 MHz,  $\text{CDCl}_3$ ).

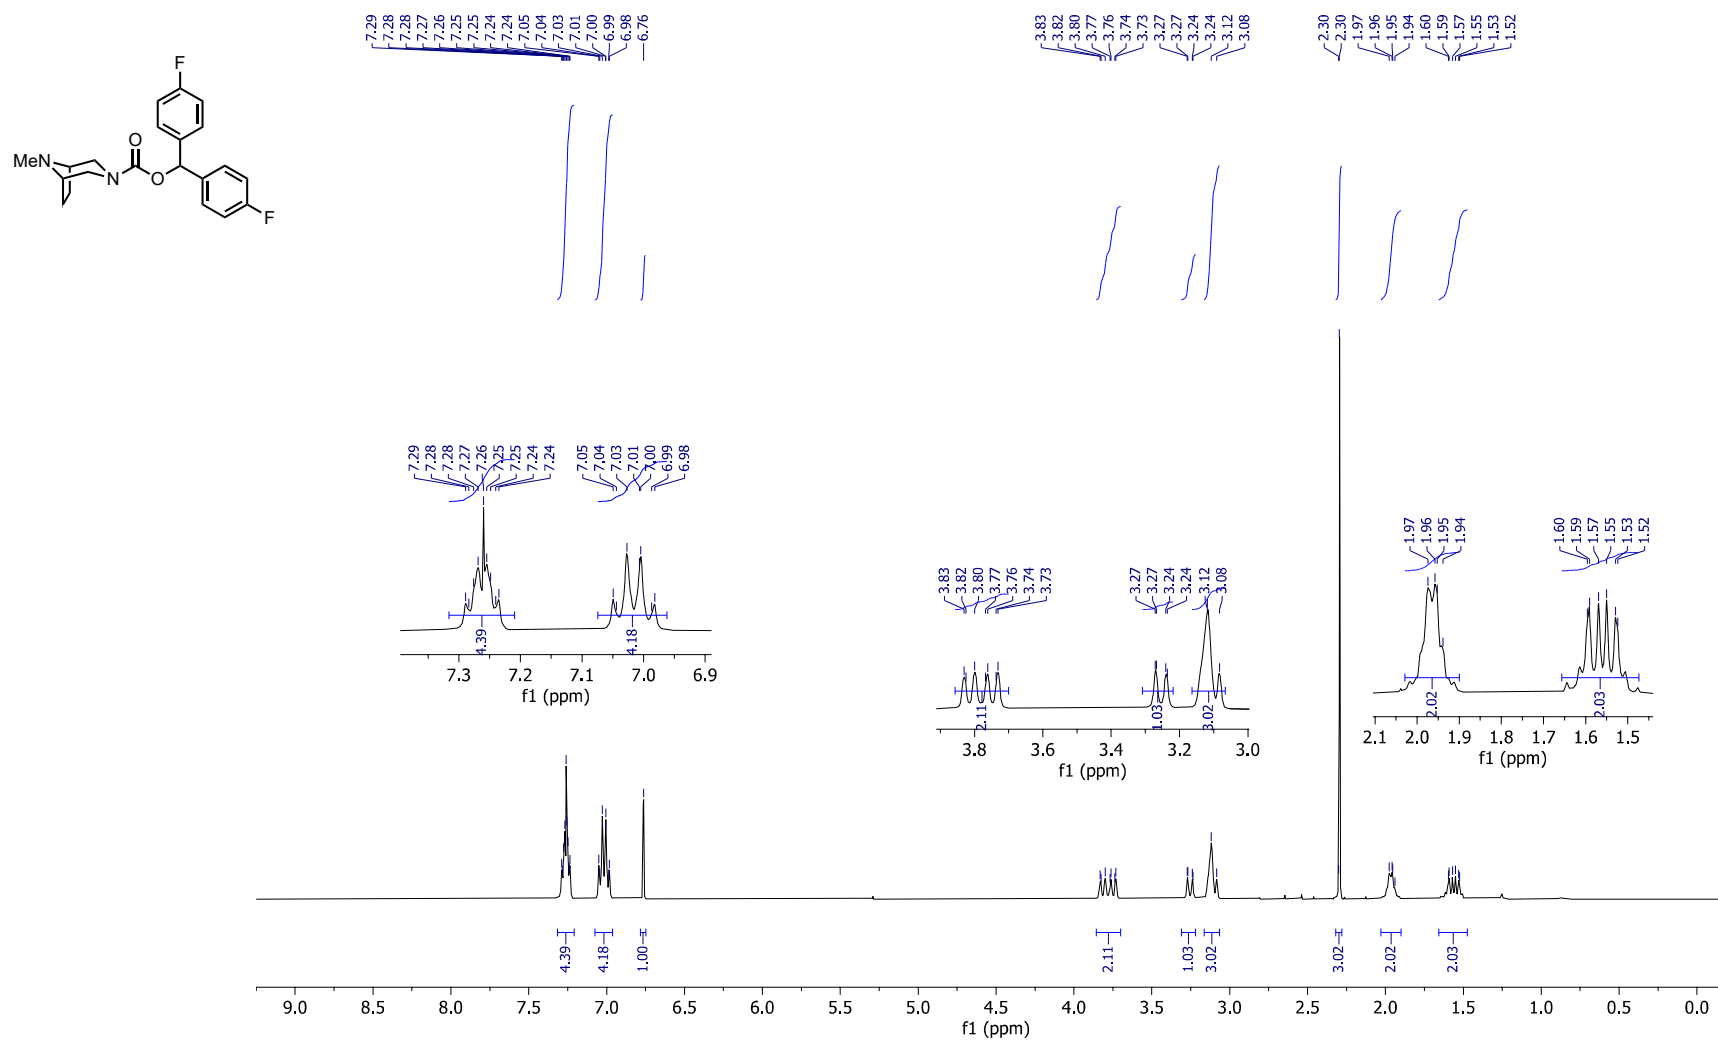Figure S23. <sup>1</sup>H NMR spectrum of 4 (400 MHz, CDCl<sub>3</sub>).

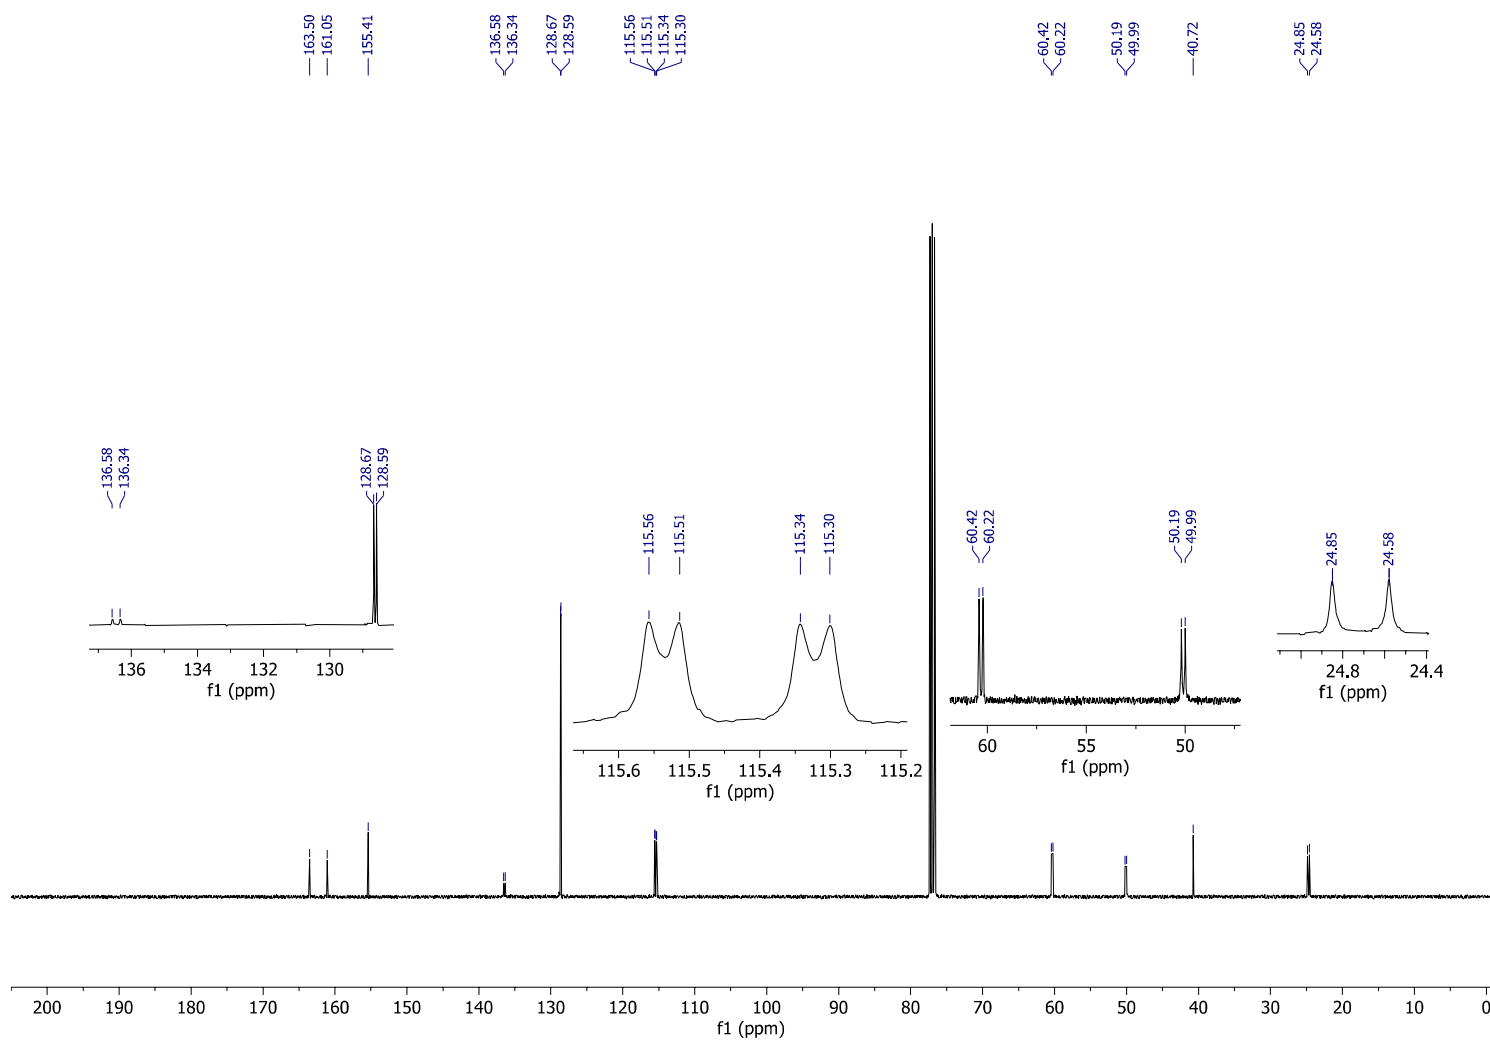

Figure S24.  $^{13}\text{C}$  NMR spectrum of **4** (100 MHz,  $\text{CDCl}_3$ ).

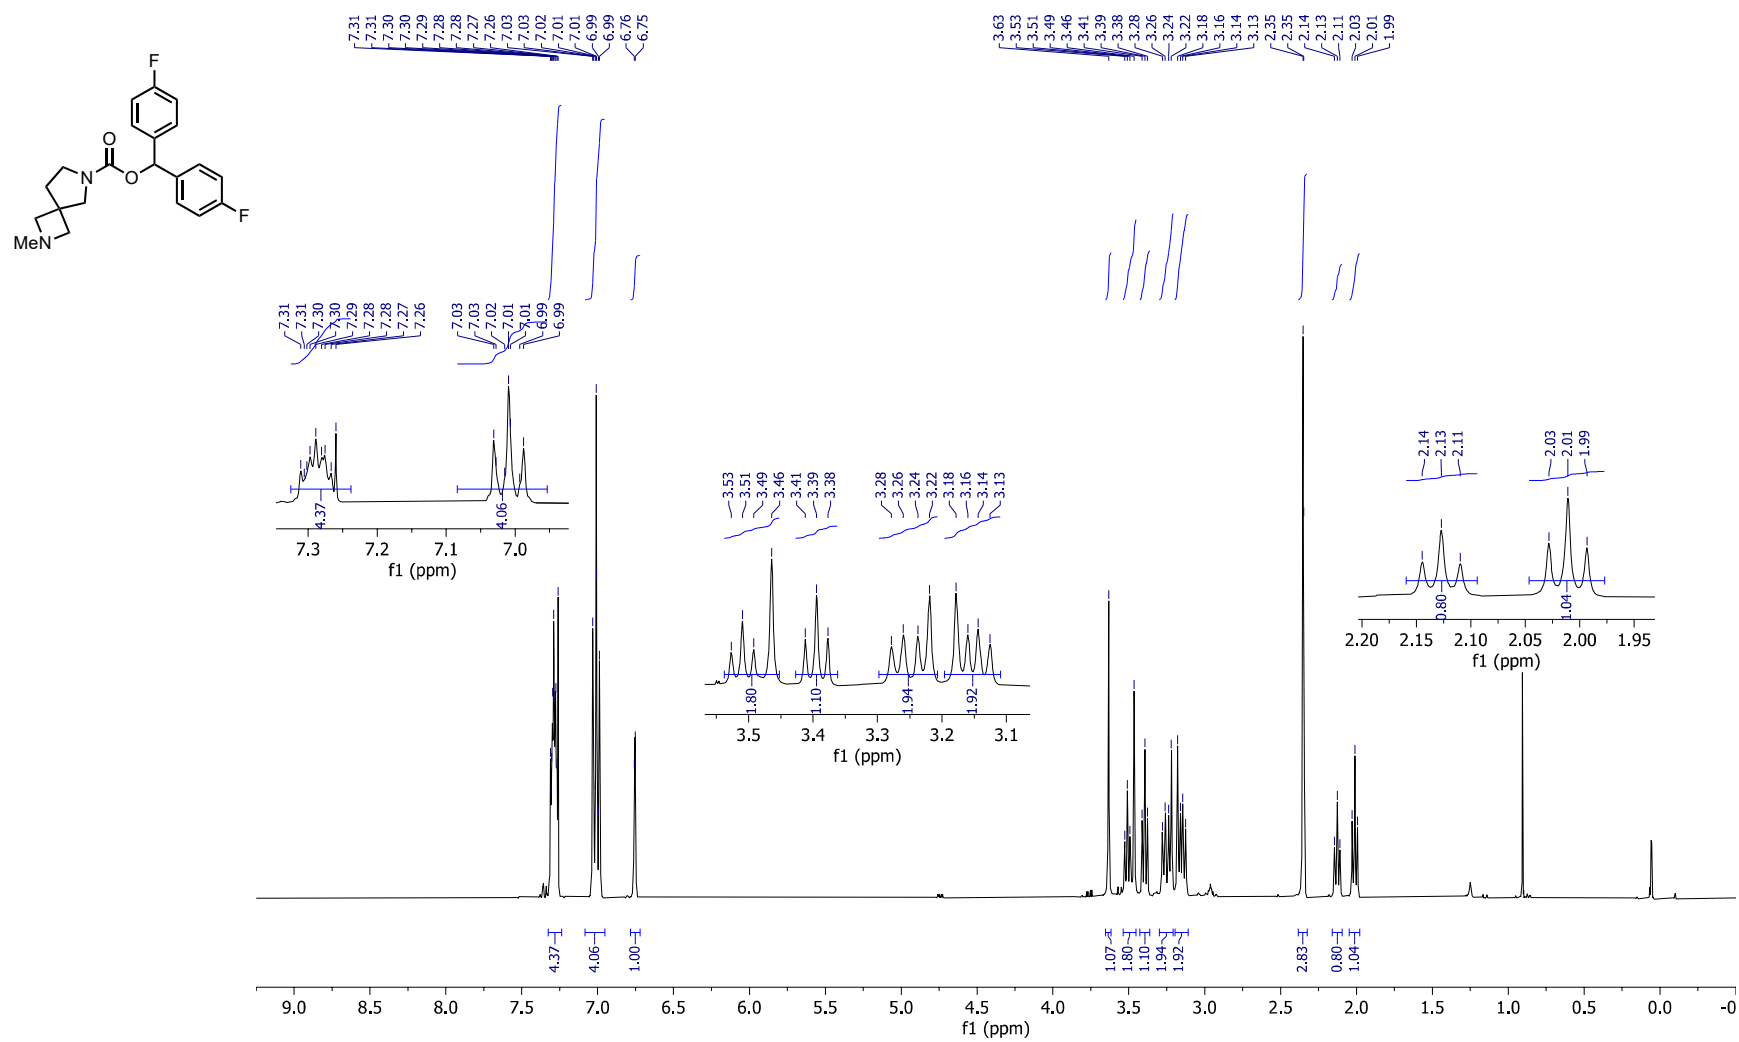Figure S25. <sup>1</sup>H NMR spectrum of 5 (400 MHz, CDCl<sub>3</sub>).

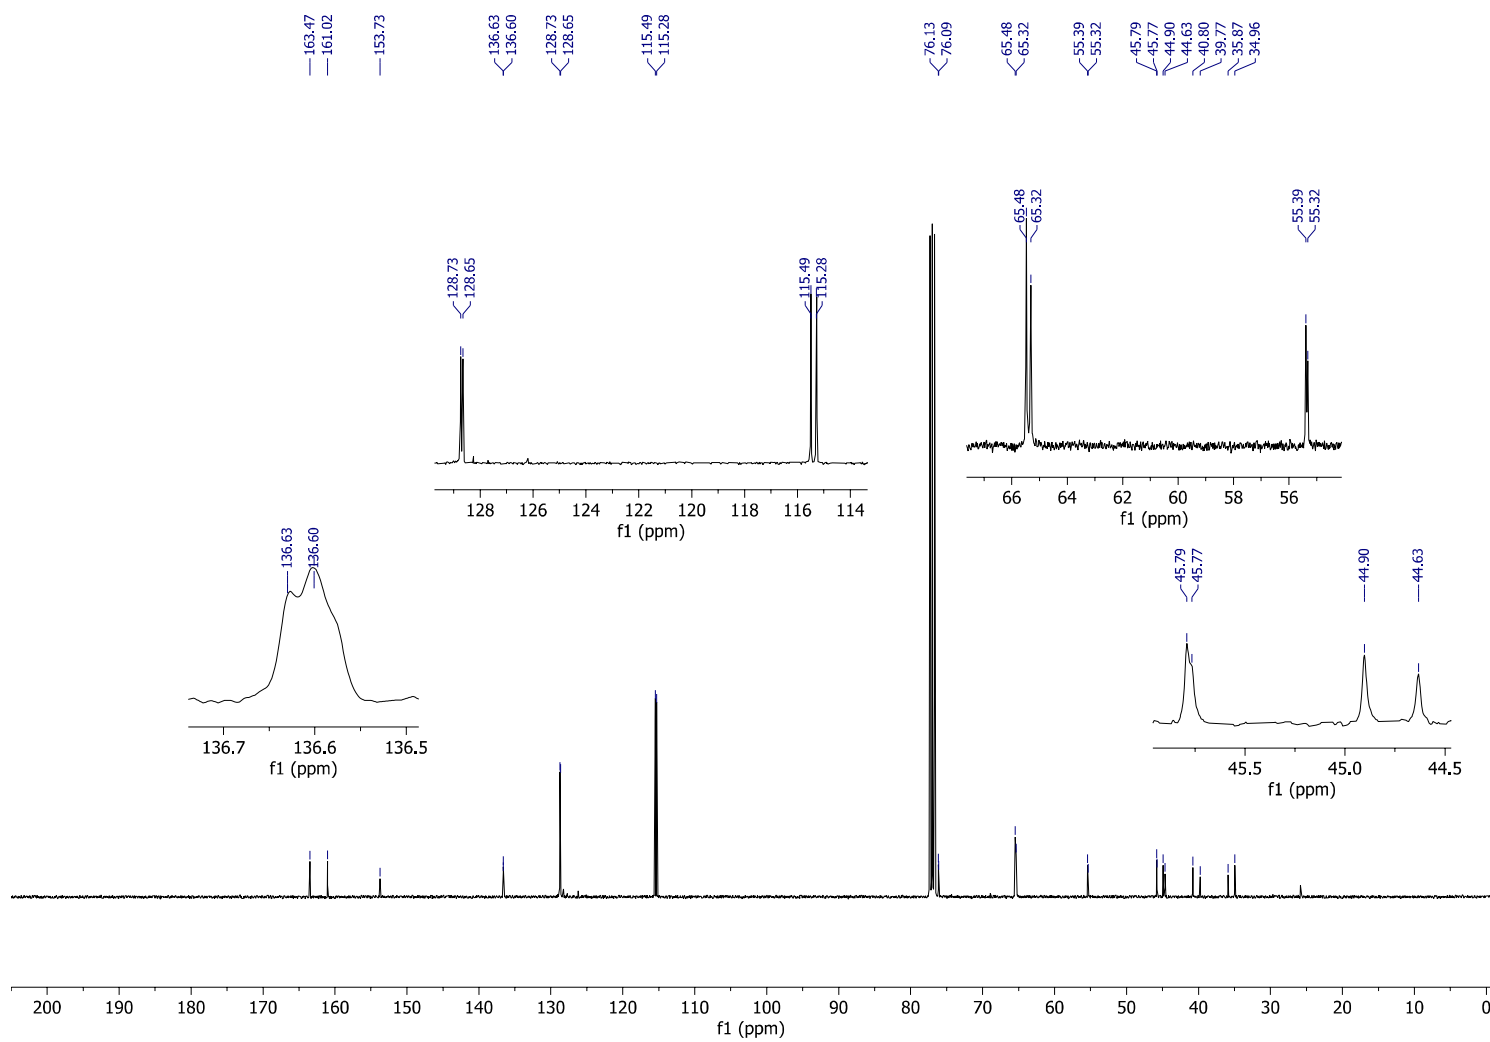

**Figure S26.**  $^{13}\text{C}$  NMR spectrum of **5** (100 MHz,  $\text{CDCl}_3$ ).

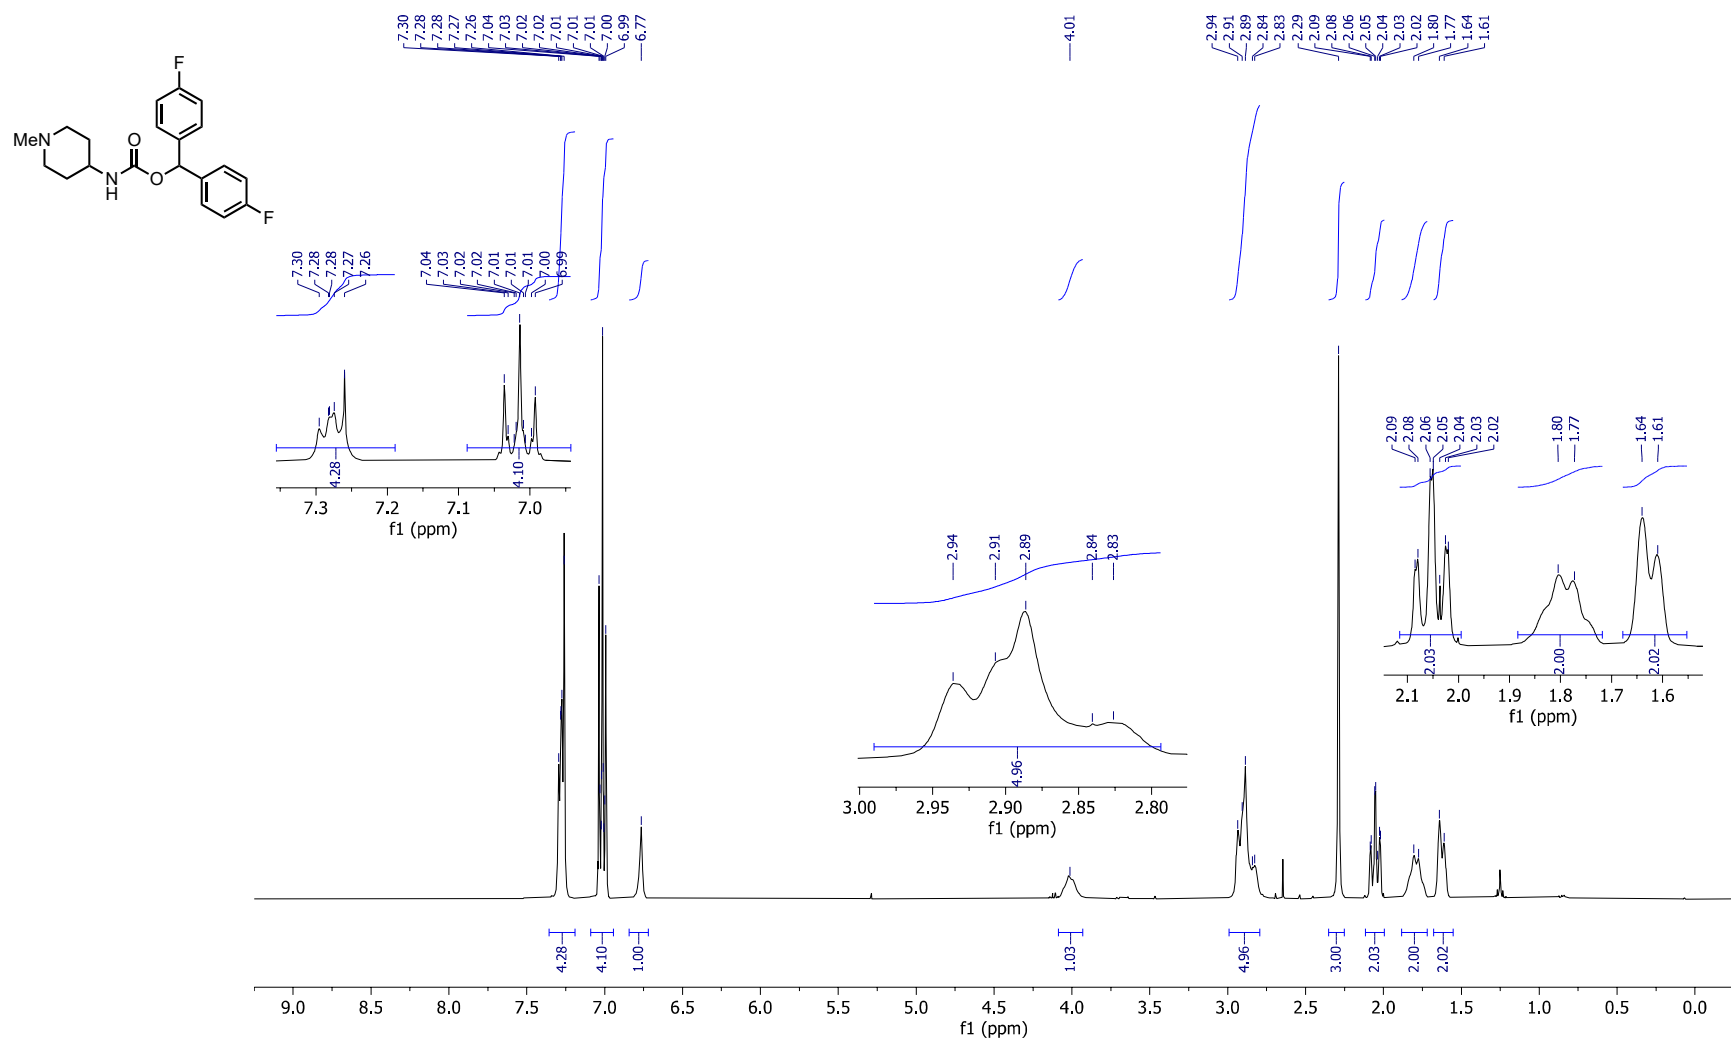Figure S27. <sup>1</sup>H NMR spectrum of 6 (400 MHz, CDCl<sub>3</sub>).



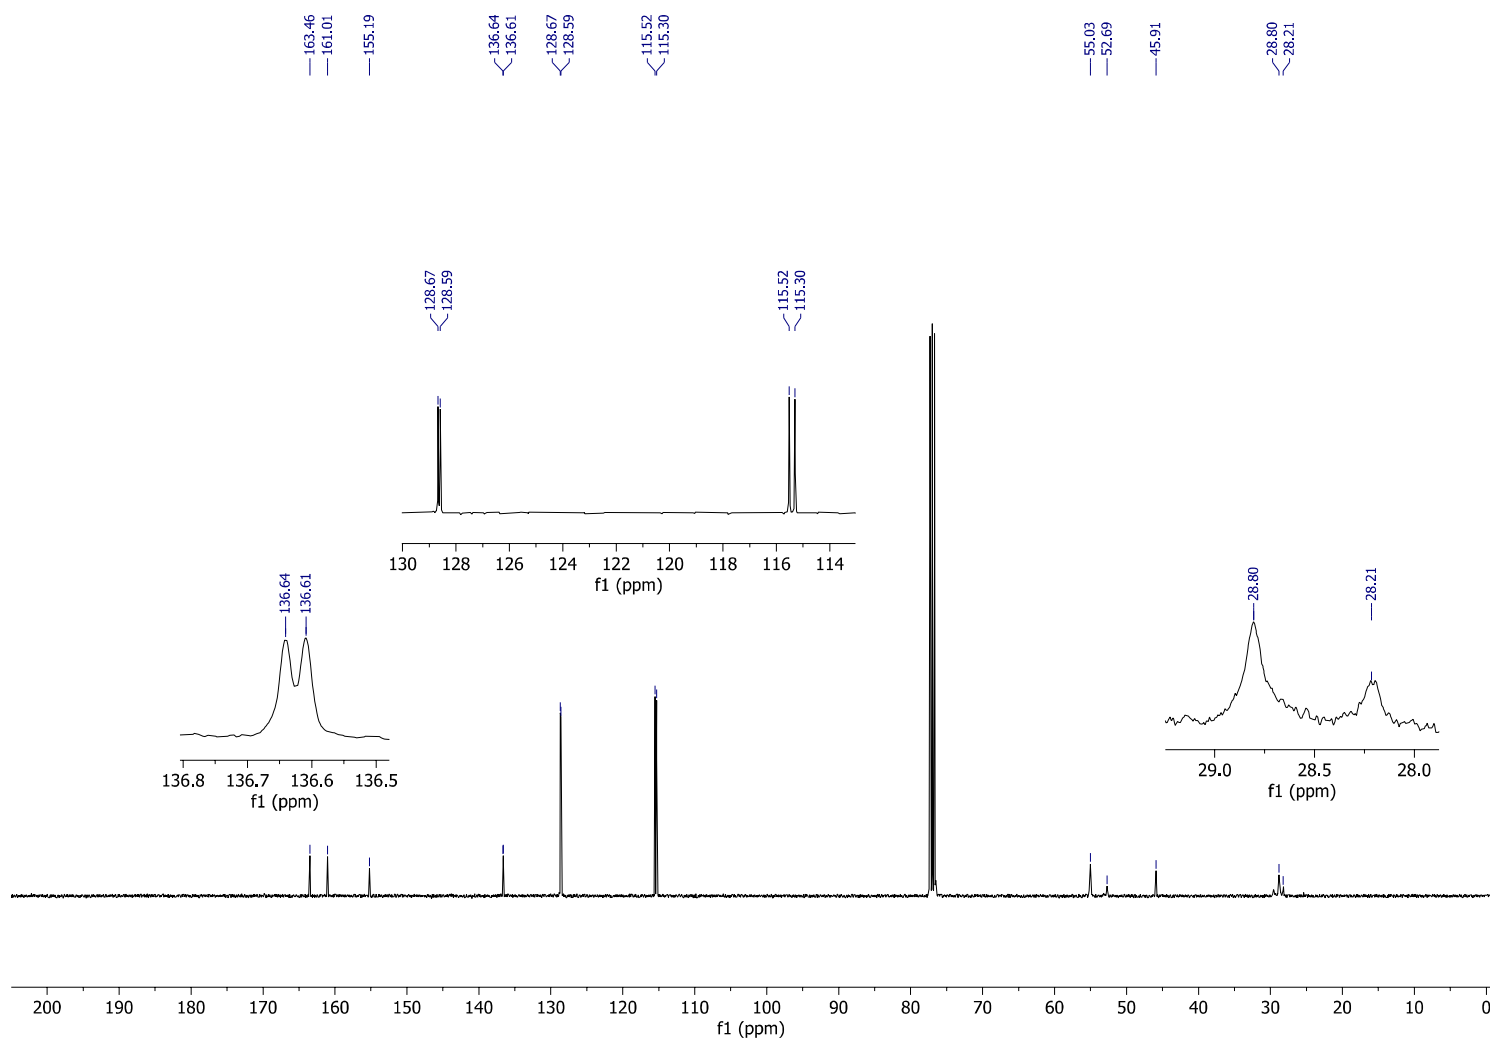**Figure S28.** <sup>13</sup>C NMR spectrum of 6 (100 MHz, CDCl<sub>3</sub>).

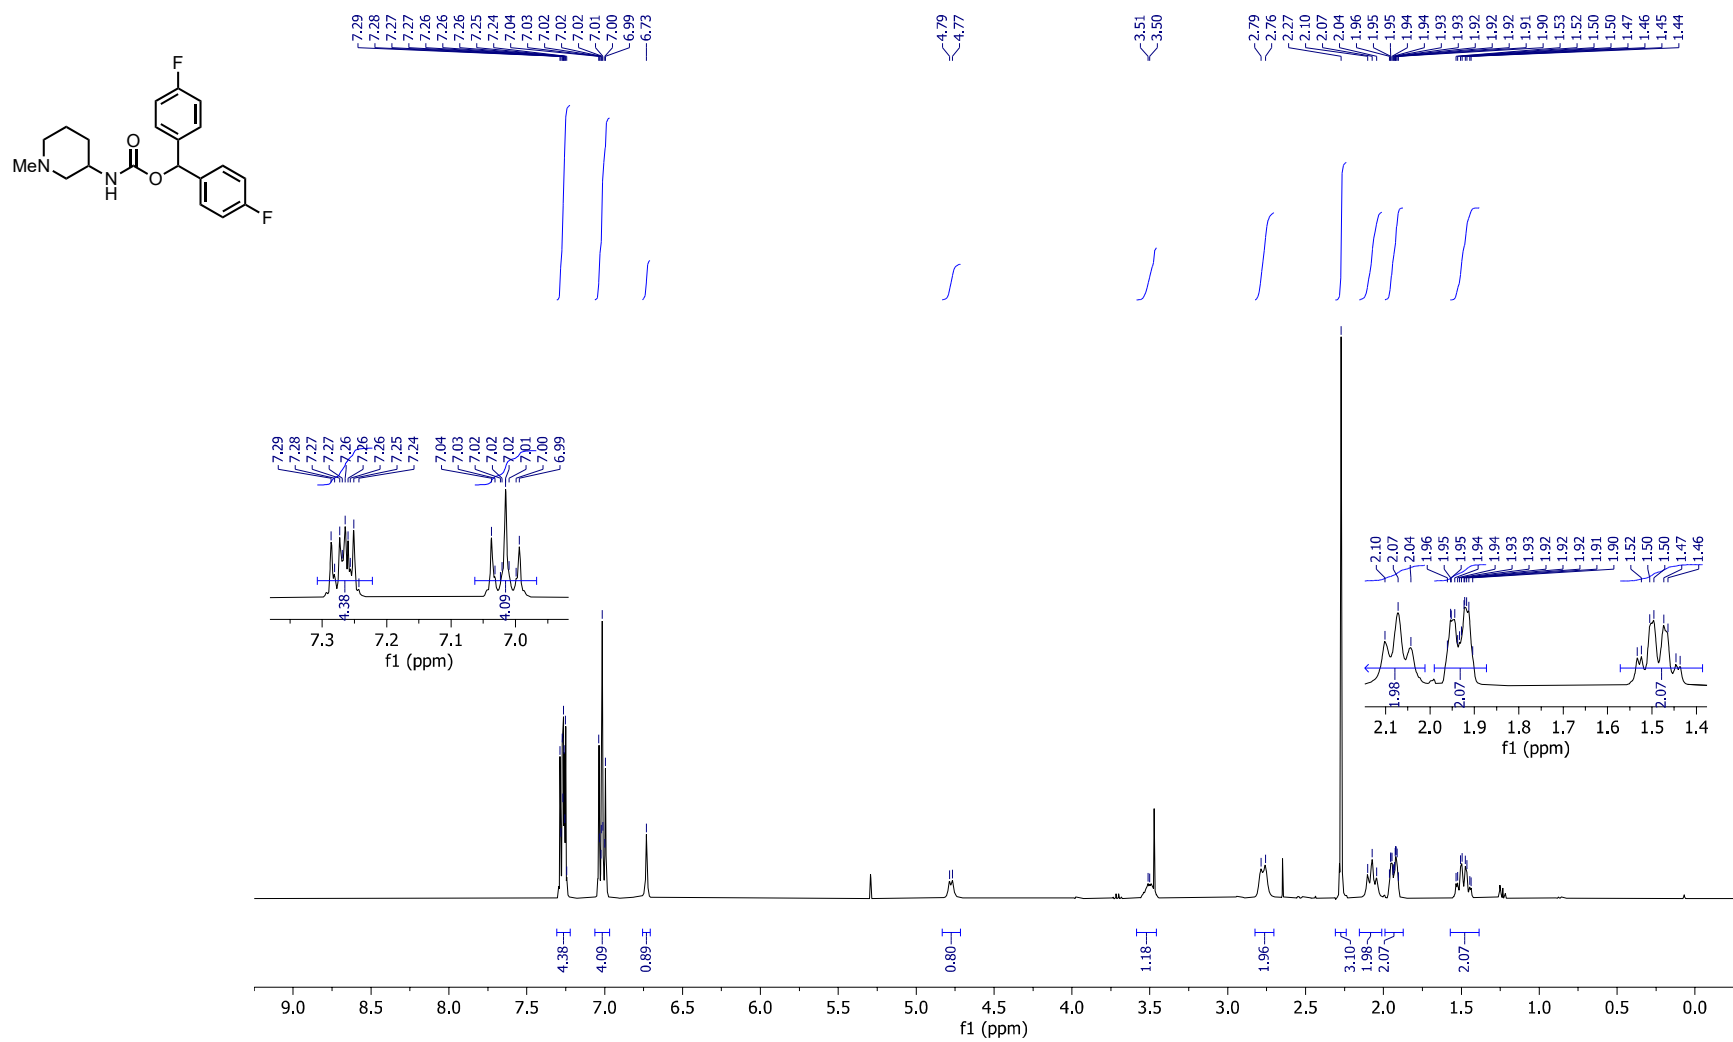Figure S29.  $^1\text{H}$  NMR spectrum of 7 (400 MHz,  $\text{CDCl}_3$ ).

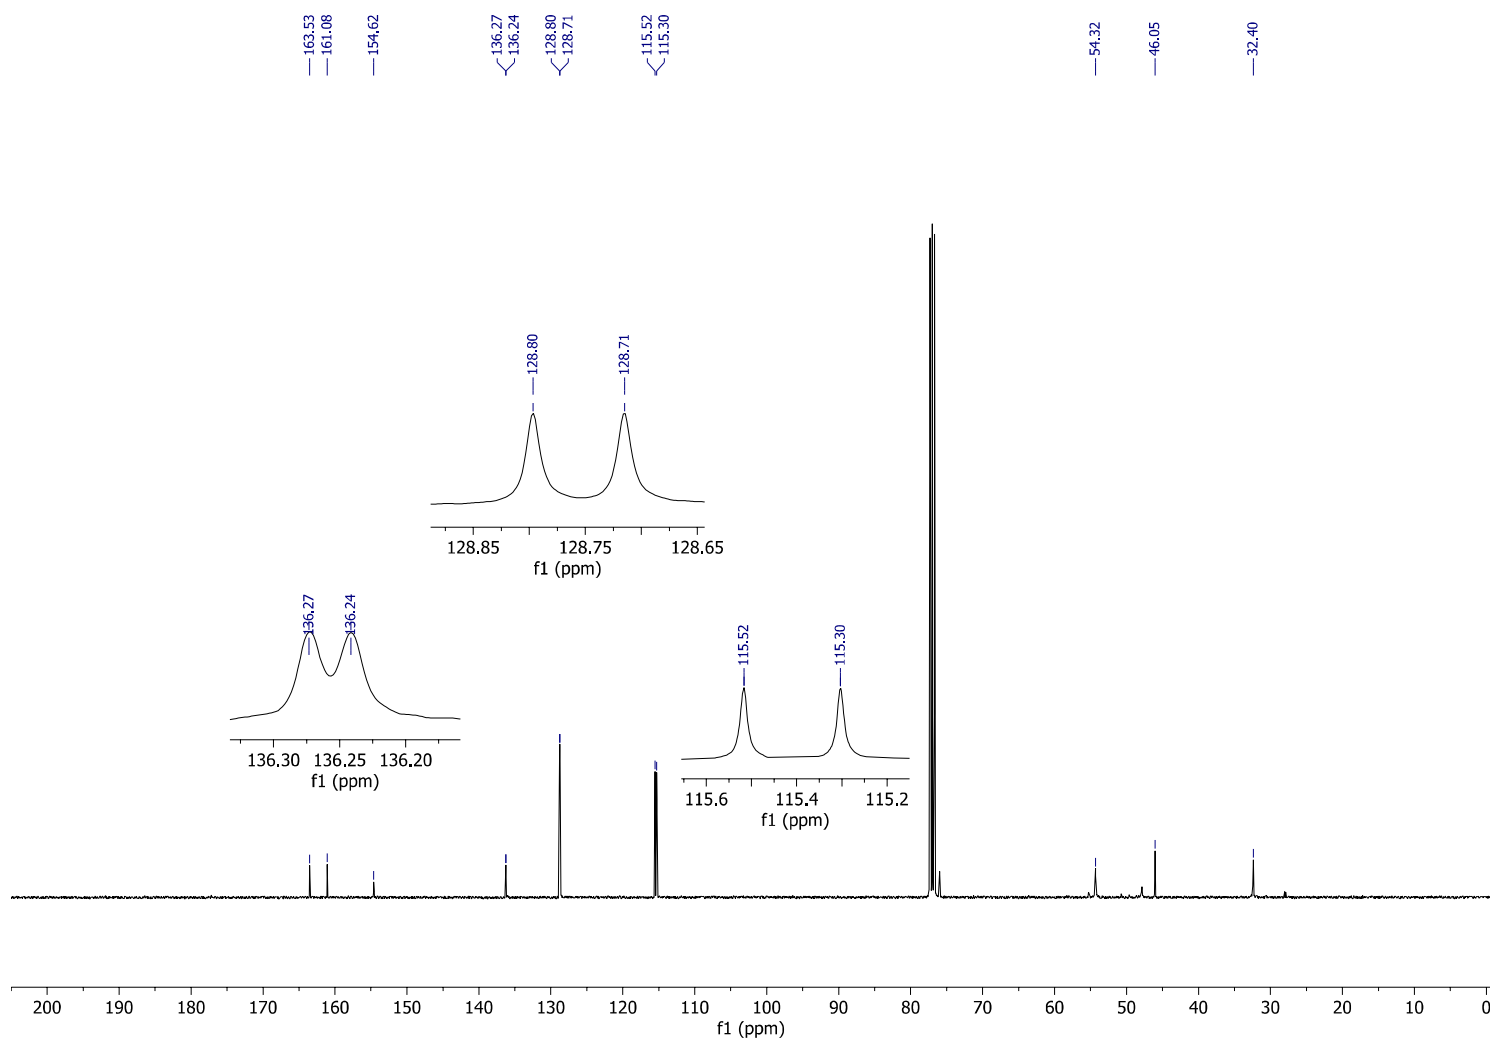**Figure S30.** <sup>13</sup>C NMR spectrum of 7 (100 MHz, CDCl<sub>3</sub>).

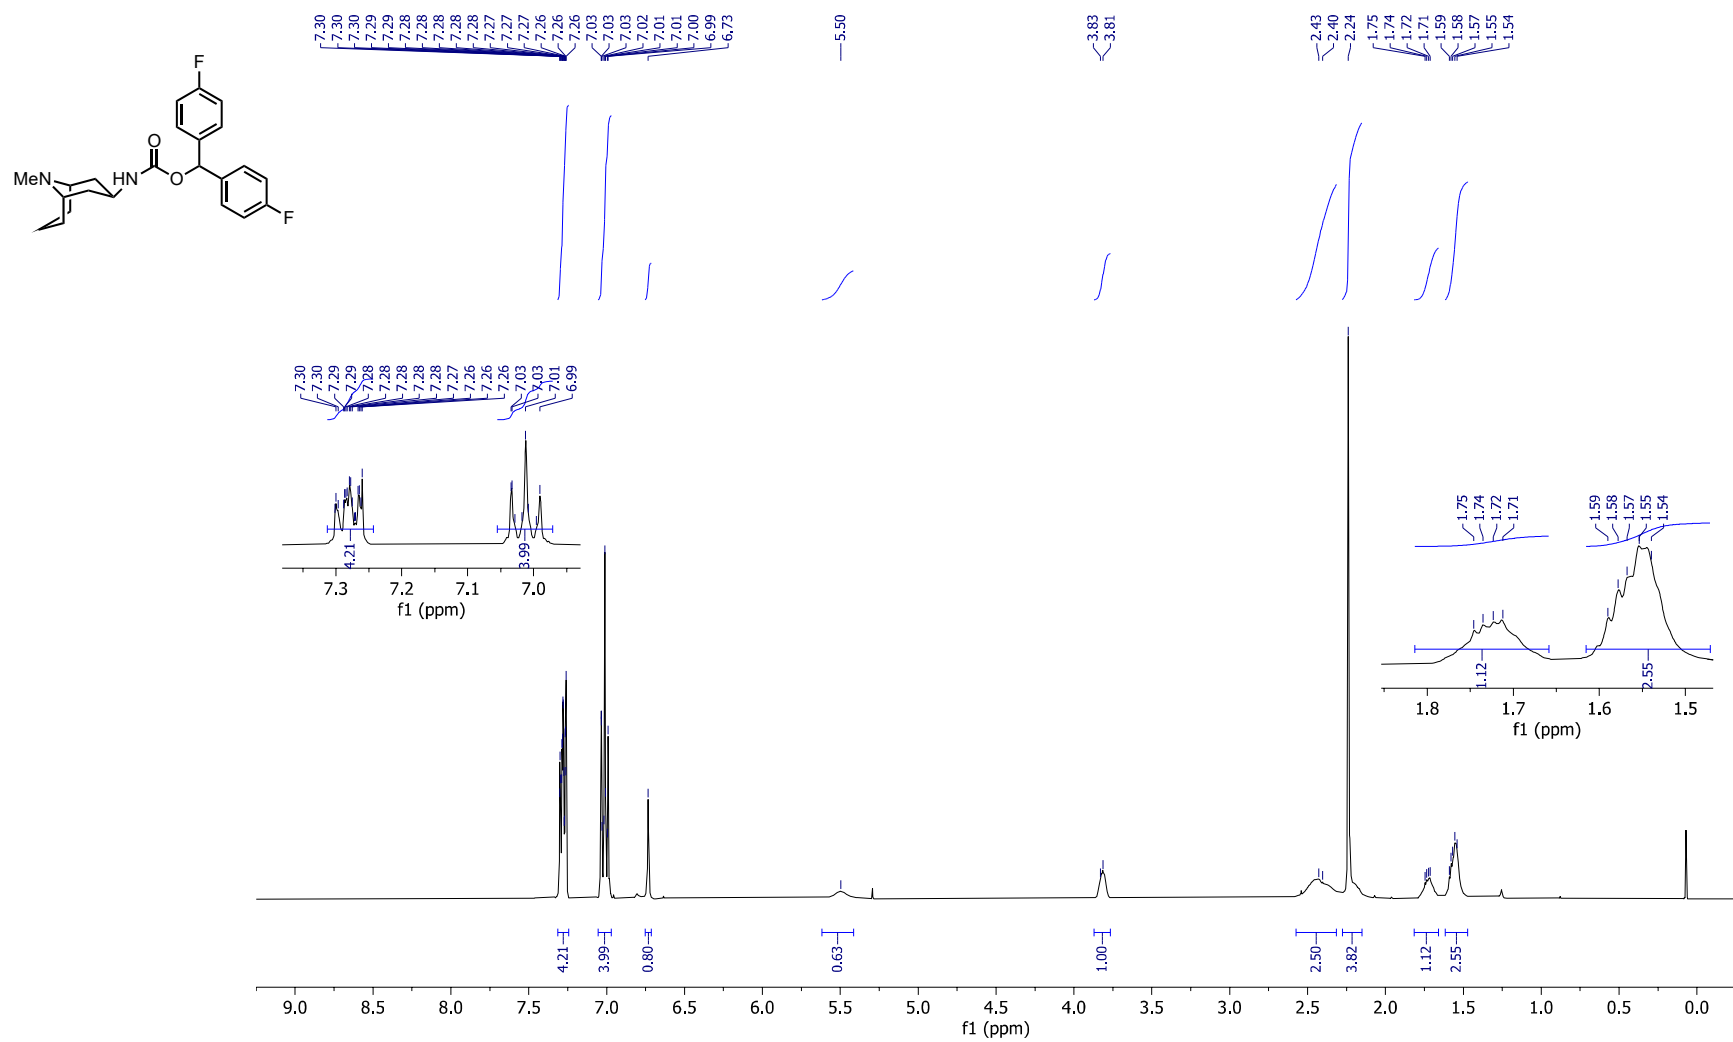

Figure S31.  $^1\text{H}$  NMR spectrum of **8** (400 MHz,  $\text{CDCl}_3$ ).

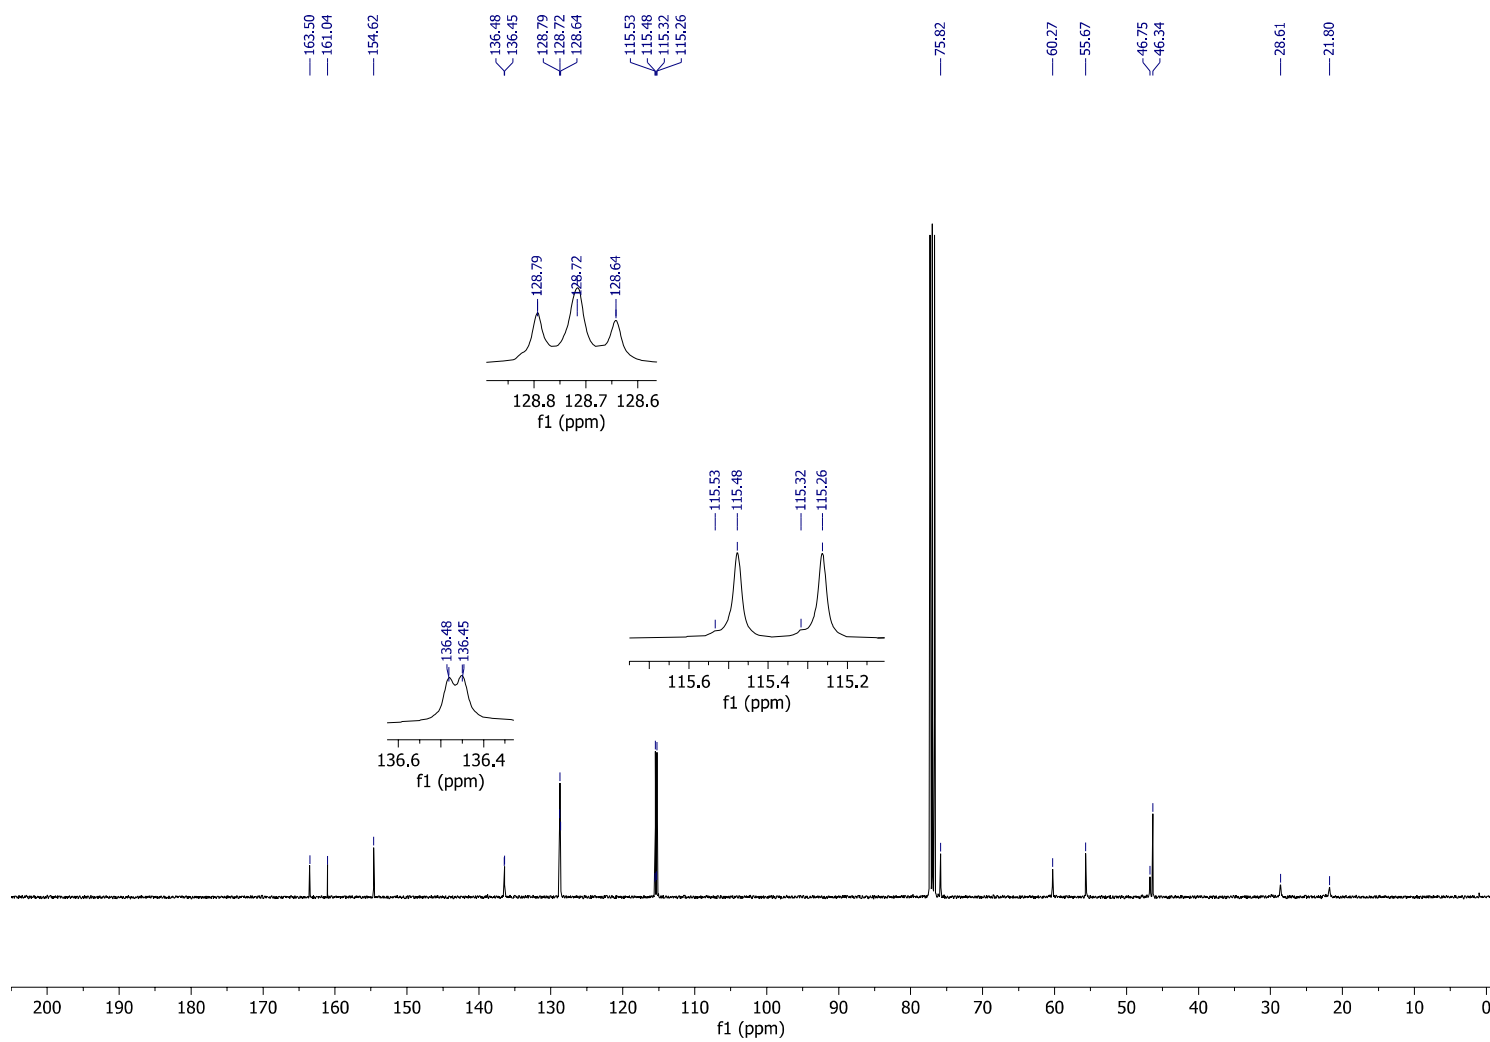

Figure S32. <sup>13</sup>C NMR spectrum of 8 (100 MHz, CDCl<sub>3</sub>).

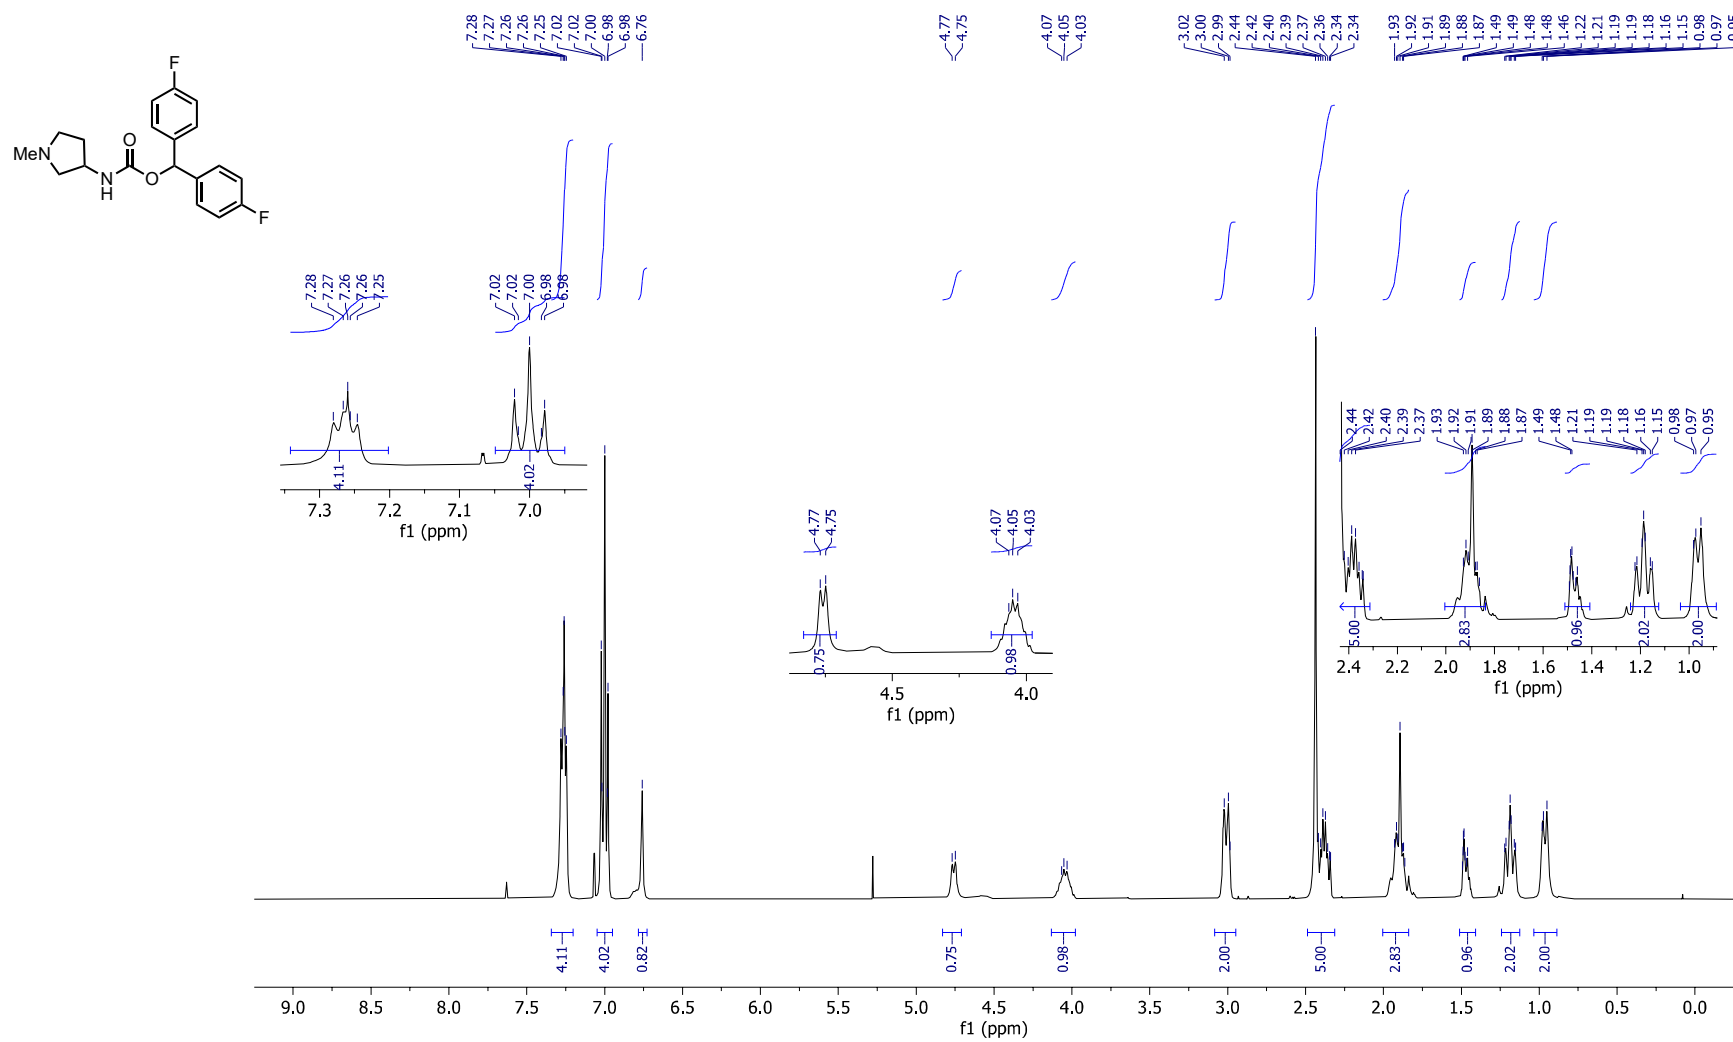**Figure S33.** <sup>1</sup>H NMR spectrum of 9 (400 MHz, CDCl<sub>3</sub>).

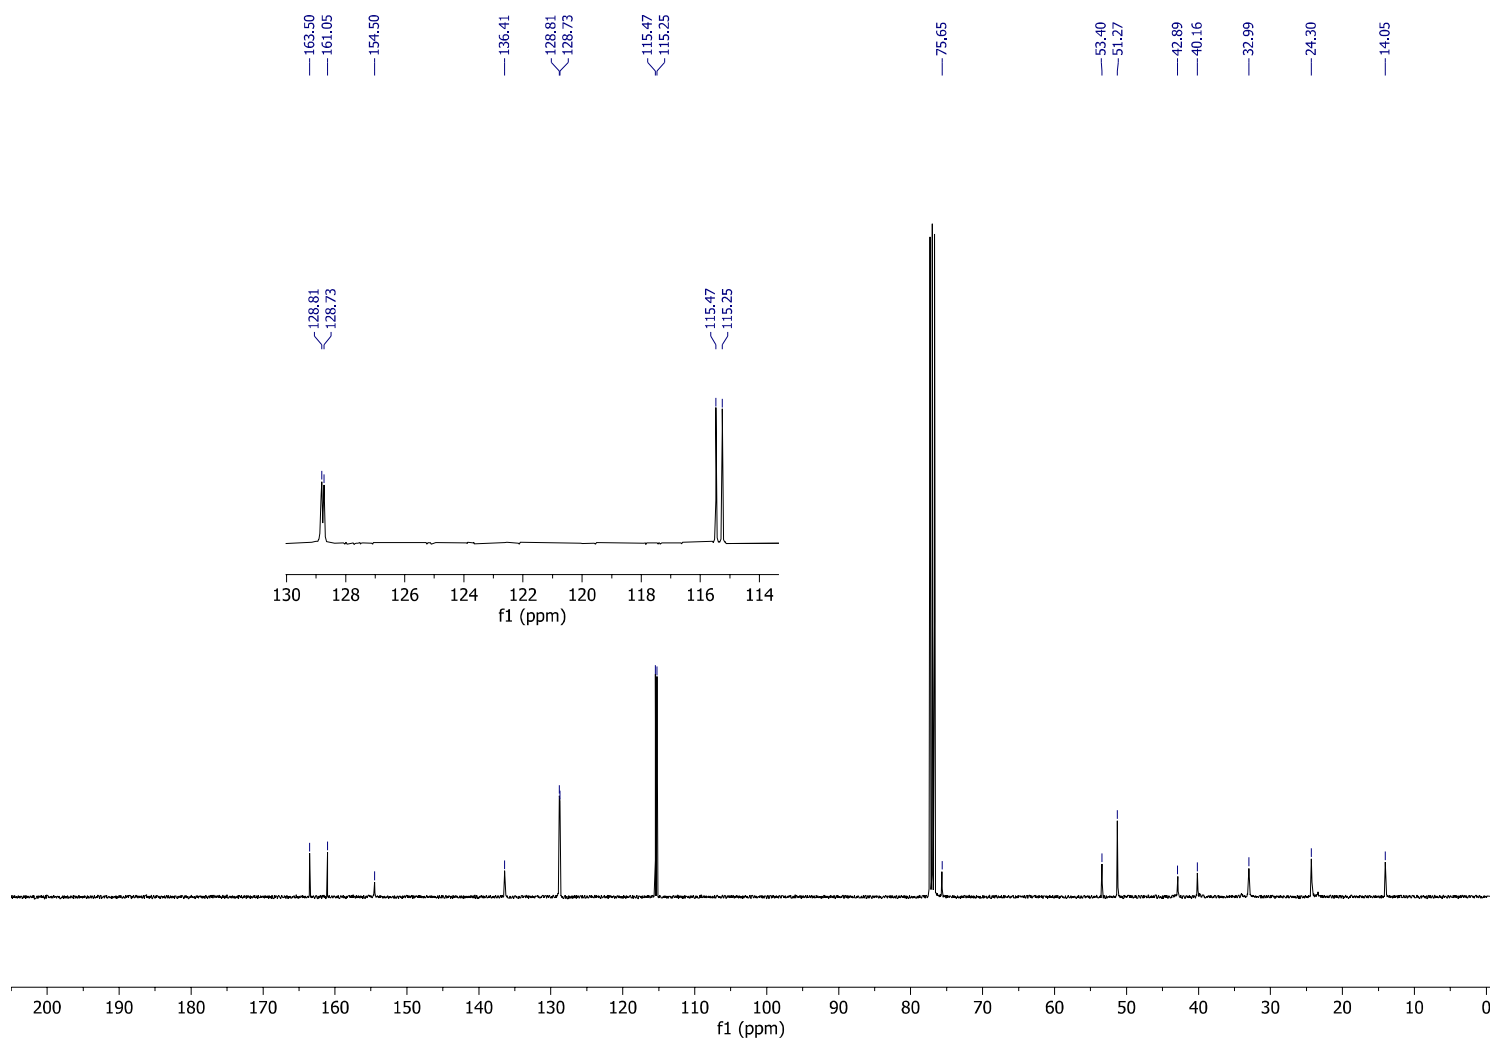

**Figure S34.** <sup>13</sup>C NMR spectrum of **9** (100 MHz, CDCl<sub>3</sub>).



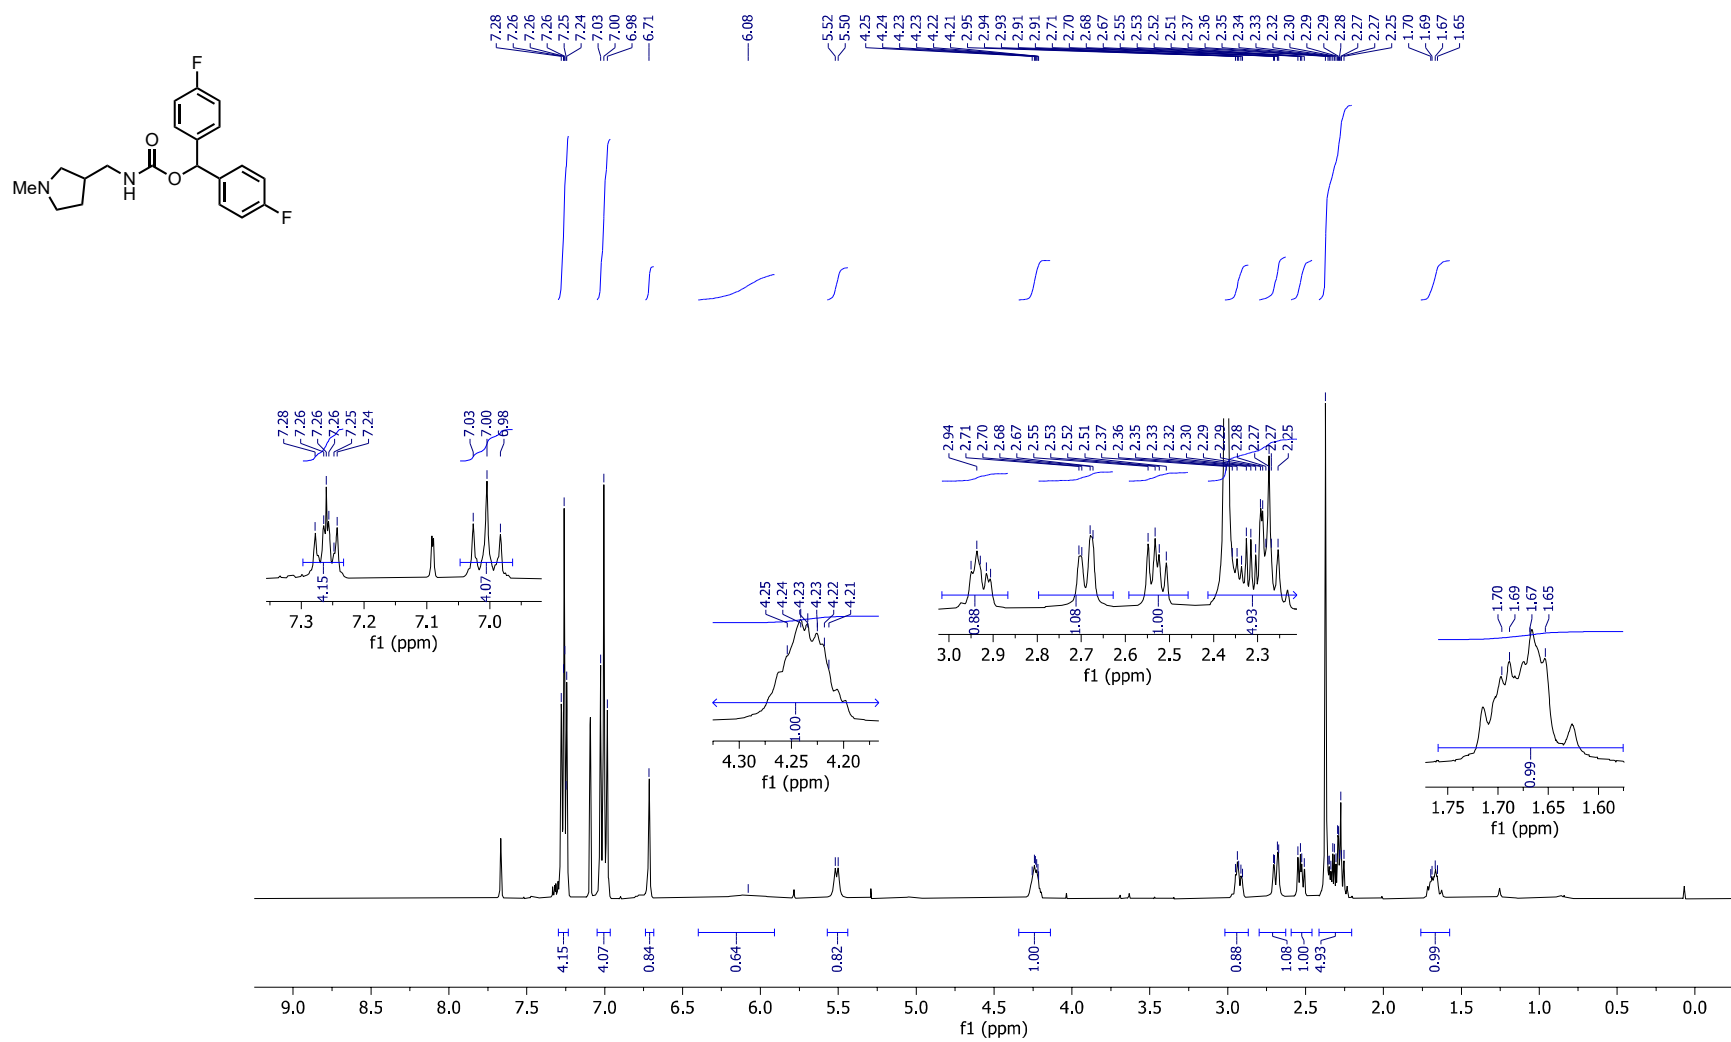Figure S35. <sup>1</sup>H NMR spectrum of **10** (400 MHz, CDCl<sub>3</sub>).

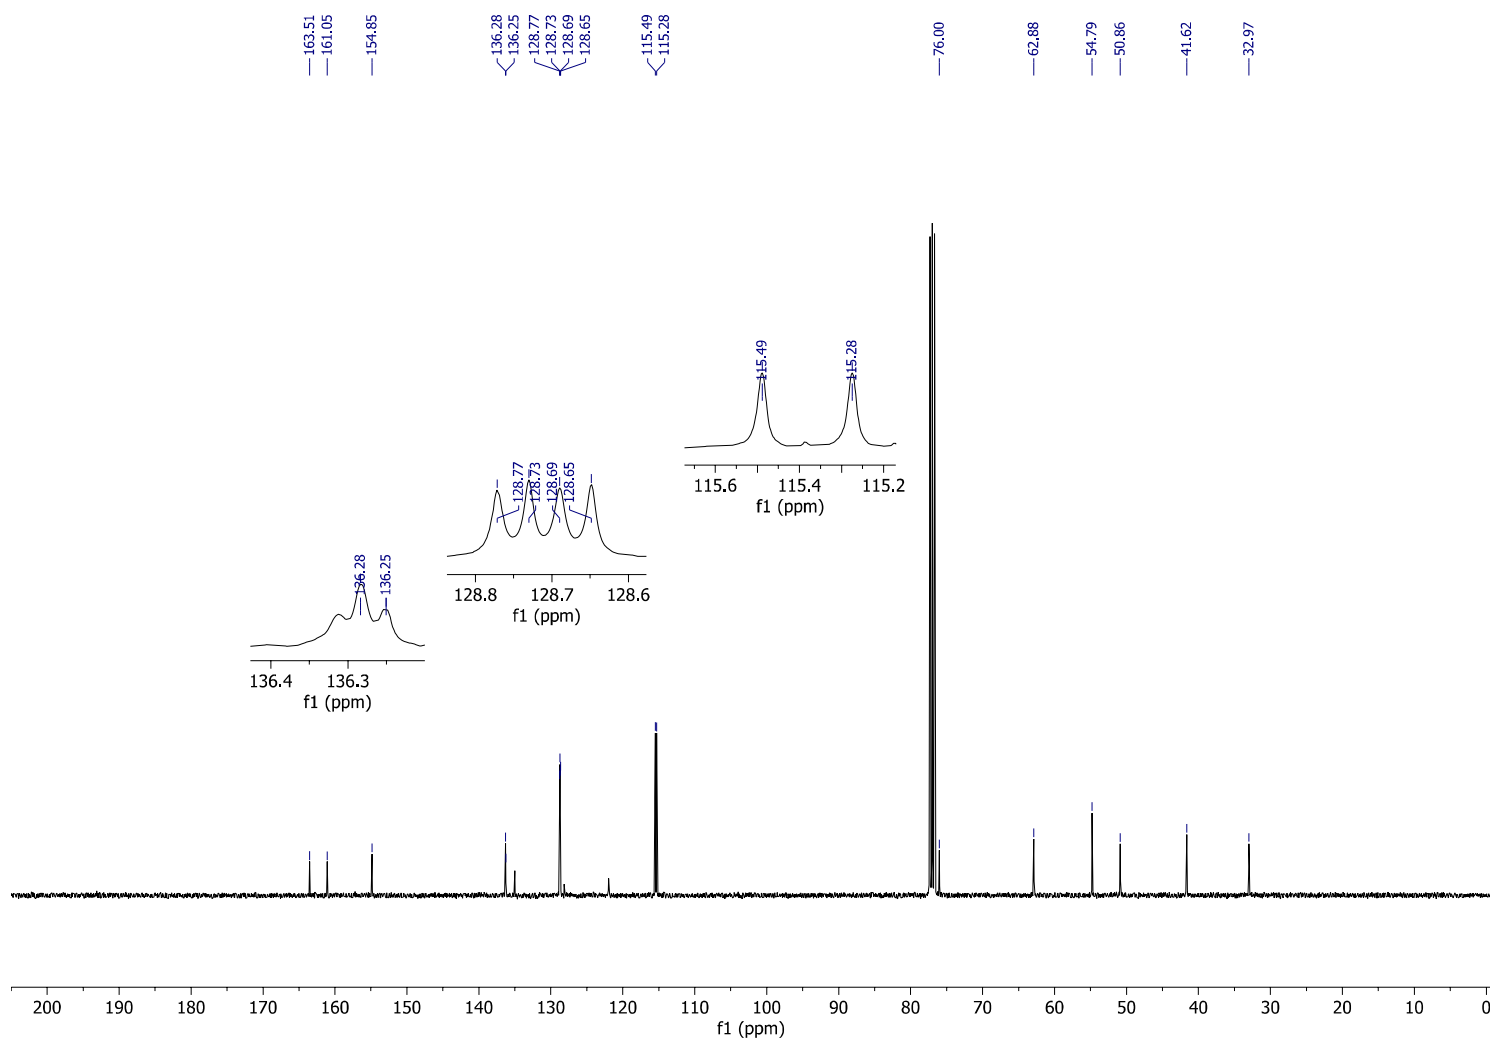

Figure S36.  $^{13}\text{C}$  NMR spectrum of **10** (100 MHz,  $\text{CDCl}_3$ ).

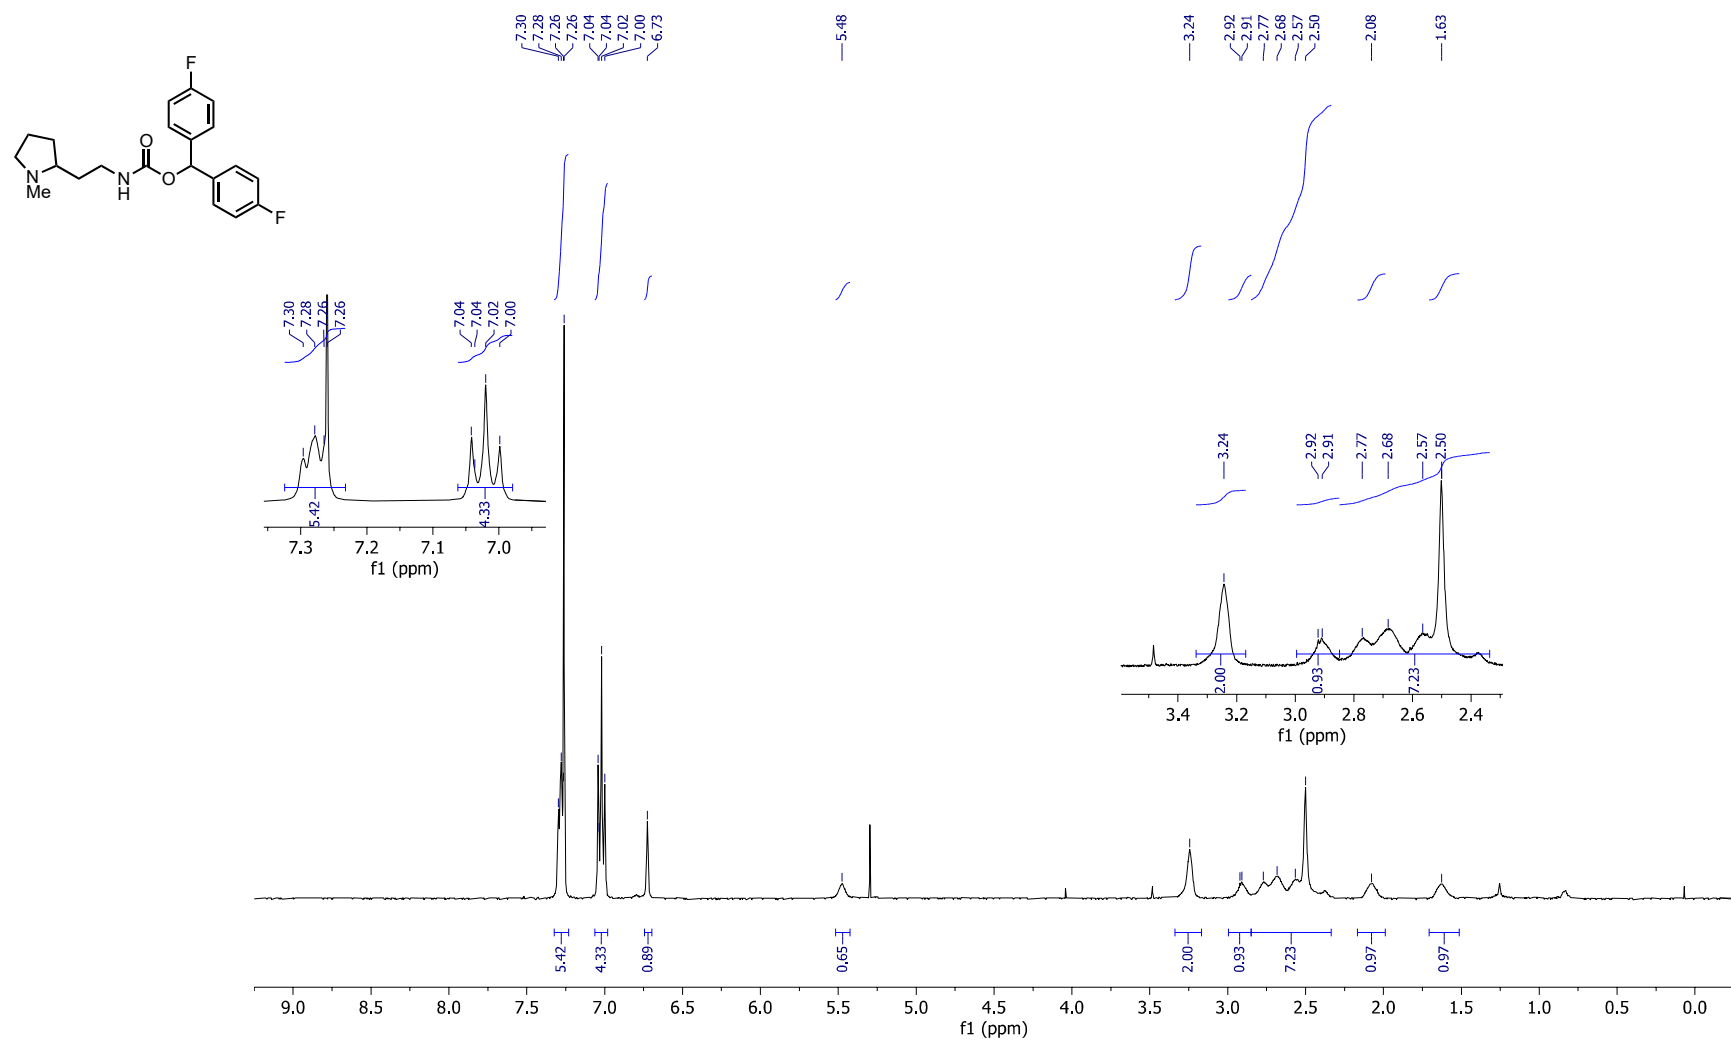

Figure S37.  $^1\text{H}$  NMR spectrum of **11** (400 MHz,  $\text{CDCl}_3$ ).

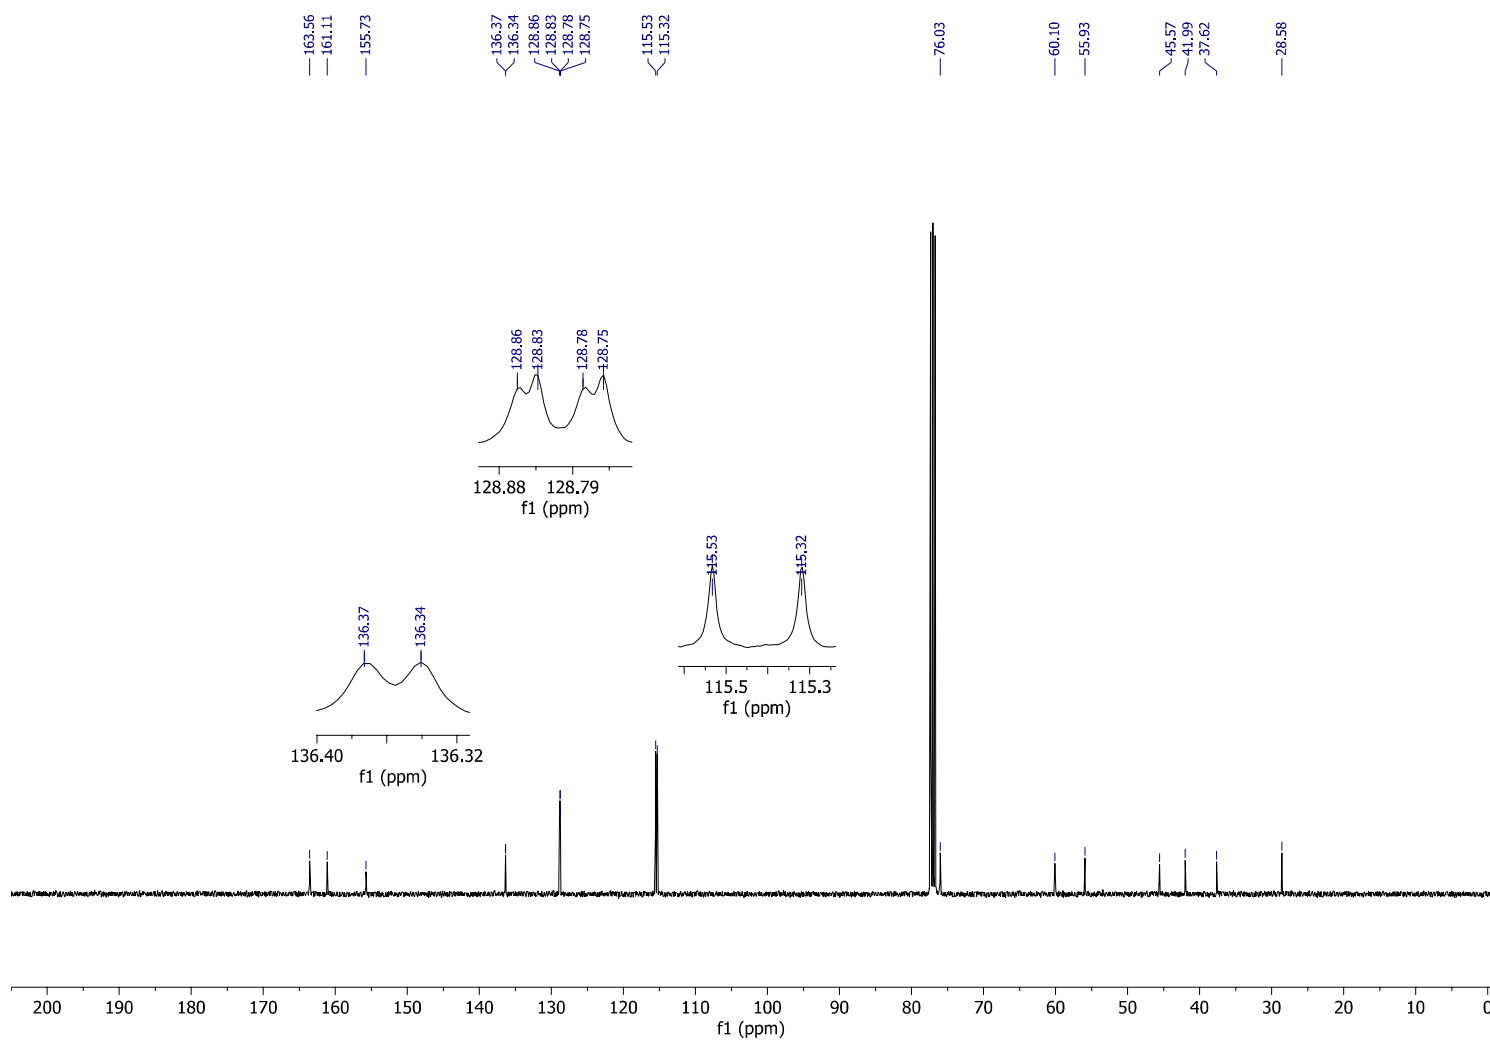

Figure S38.  $^{13}\text{C}$  NMR spectrum of 11 (100 MHz,  $\text{CDCl}_3$ ).

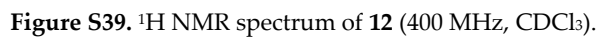

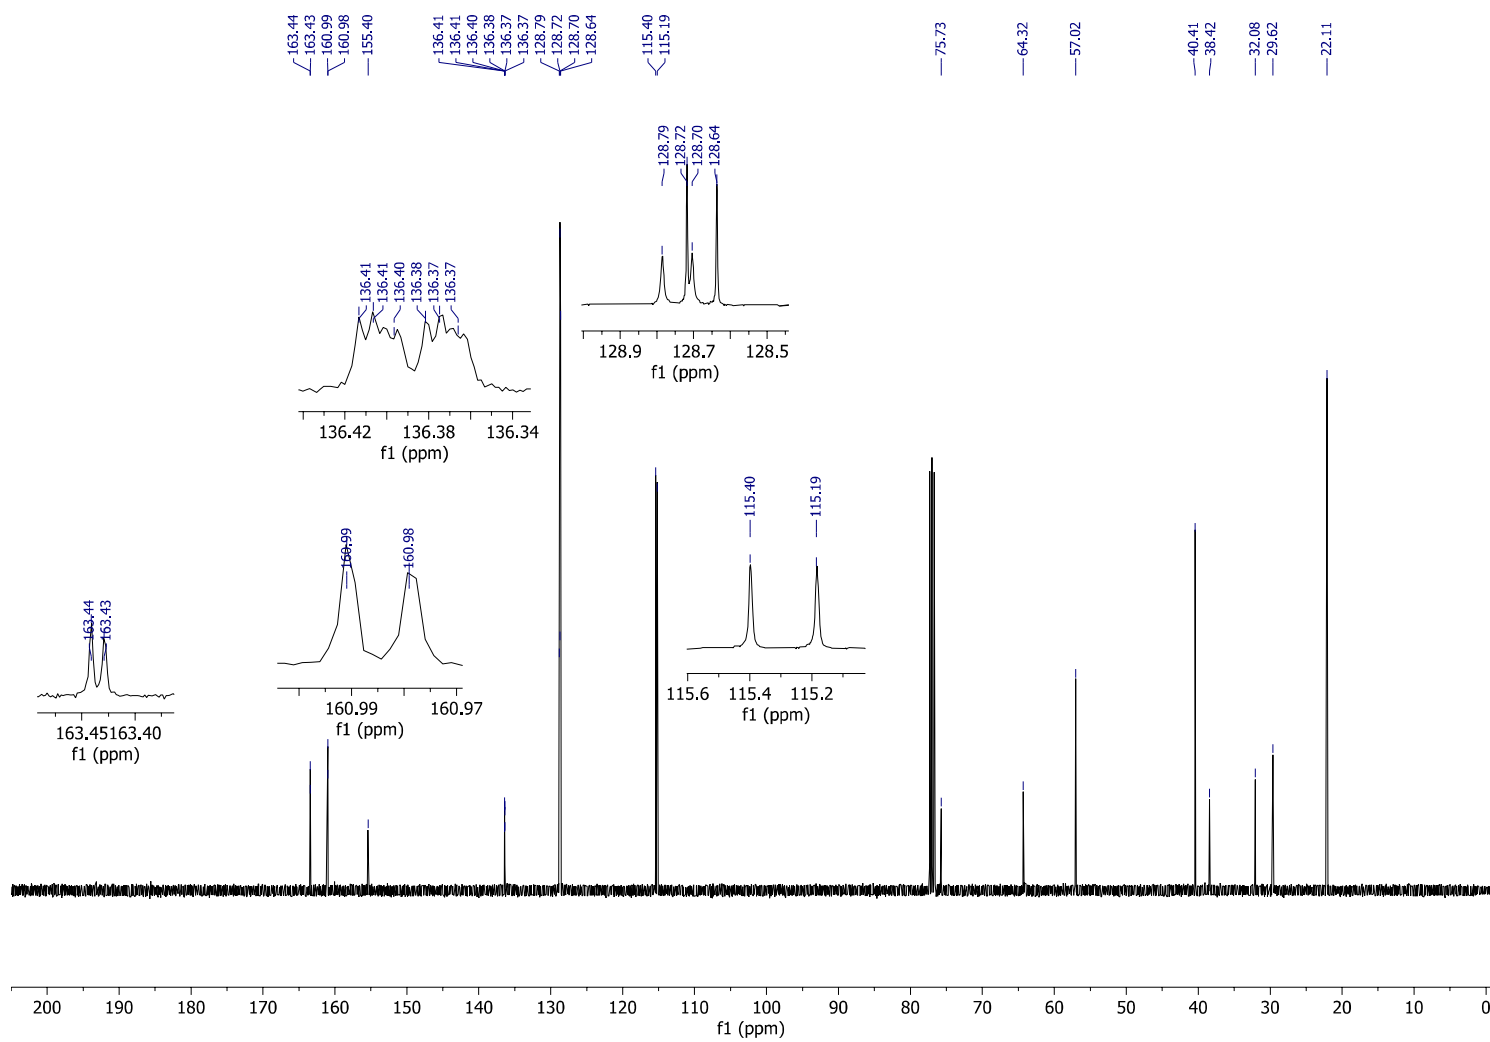

Figure S40.  $^{13}\text{C}$  NMR spectrum of **12** (100 MHz,  $\text{CDCl}_3$ ).
